1  
2  
3  
4  
5  
6  
7  
8  
9  
10  
11  
12  
13  
14  
15  
16  
17  
18  
19  
20  
21  
22  
23  
24  
25  
26  
27  
28  
29

## **Long-term high-yield skeletal muscle stem cell expansion through staged perturbation of cytokine signaling in a soft hydrogel culture platform**

Alexander M. Loiben <sup>1,#</sup>, Kun Ho Kim <sup>1,#,a</sup>, Sharon Y. Soueid-Baumgarten <sup>1,#,b</sup>, Victor M. Aguilar <sup>1,#,c</sup>,  
Jonathan Chin Cheong <sup>1</sup>, Ruth F. Kopyto <sup>2,d</sup>, Paula Fraczek <sup>1,e</sup>, Ern Hwei Hannah Fong <sup>1</sup>,  
Rahul Mangal <sup>3,f</sup>, Lynden A. Archer <sup>3</sup>, and Benjamin D. Cosgrove <sup>1,%</sup>

<sup>1</sup> Meinig School of Biomedical Engineering, <sup>2</sup> Biological Sciences Program, College of Agriculture and Life Sciences, and <sup>3</sup> Smith School of Chemical and Biomolecular Engineering, Cornell University, Ithaca, NY, USA

# These authors contributed equally

% Corresponding author:

Ben Cosgrove

Meinig School of Biomedical Engineering, Cornell University

159 Weill Hall, 526 Campus Road, Ithaca, NY 14853, USA

telephone: 607-255-7271

email: [bdc68@cornell.edu](mailto:bdc68@cornell.edu)

Current affiliations:

<sup>a</sup> Department of Animal Sciences, Purdue University, West Lafayette, IN, USA

<sup>b</sup> Department of Biochemistry, Technion Israel Institute of Technology, Haifa, Israel

<sup>c</sup> Department of Bioengineering, University of Illinois-Chicago, Chicago, IL, USA

<sup>d</sup> Program in Pharmacology, Weill Cornell Medicine, New York City, NY, USA

<sup>e</sup> Department of Biomedical Engineering, University of Michigan, Ann Arbor, MI, USA

<sup>f</sup> Department of Chemical Engineering, Indian Institute of Technology Kanpur, Uttar Pradesh, India

30 **Abstract**

31 Muscle stem cells (MuSCs) are an essential stem cell population for skeletal muscle homeostasis and  
32 regeneration throughout adulthood. MuSCs are an ideal candidate for cell therapies for chronic and acute  
33 muscle injuries and diseases given their inherent ability to self-renew and generate progenitor cells  
34 capable of myogenic commitment and fusion. Given their rarity and propensity to lose stem-cell potential  
35 in prolonged culture, methods for *ex vivo* MuSC expansion that achieve clinical-scale stem cell yields  
36 represent a critical unmet need in muscle cell-therapeutic development. Here, we tested a  
37 microenvironment engineering approach to achieve long-term adult mouse MuSC expansion suitable for  
38 clinical demands through the combined optimization of techniques previously reported to achieve small-  
39 yield MuSC expansion in short-term cultures. We developed an optimized protocol for high-yield MuSC  
40 expansion through the combination of inflammatory cytokine and growth factor co-stimulation, temporally-  
41 staged inhibition of the p38 $\alpha$ / $\beta$  mitogen activated protein kinase signaling pathway, and modulation of  
42 substrate rigidity in long-term hydrogel cultures. We found that, on soft, muscle-mimicking (12 kPa)  
43 hydrogel substrates, a mixture of the cytokines TNF- $\alpha$ , IL-1 $\alpha$ , IL-13, and IFN- $\gamma$  and the growth factor  
44 FGF2 stimulated robust exponential proliferation of adult MuSCs from both wildtype and *mdx* dystrophic  
45 mice for up to five weeks of culture that was accompanied by a phenotype shift towards committed  
46 myocytes. After observing that the temporal variation in myogenic commitment coincided with an  
47 oscillatory activation of p38 $\alpha$ / $\beta$  signaling, we tested a late-stage p38 $\alpha$ / $\beta$  inhibition strategy and found that  
48 blocking p38 $\alpha$ / $\beta$  signaling after three weeks, but not earlier, substantially enhanced cell yield, stem-cell  
49 phenotypes, and, critically, preserved transplantation potential for up to five weeks of FGF2/cytokine mix  
50 culture on soft hydrogels. Notably, this retention of transplant engraftment potency was not observed on  
51 traditional plastic substrates. We estimate that this protocol achieves >10<sup>8</sup>-fold yield in Pax7<sup>+</sup> stem cells  
52 from each starting MuSC, which represents a substantial improvement in stem-cell yield from long-term  
53 cultures compared to established methods.

54 **Highlights**

- 55 • TNF- $\alpha$ /IL-1 $\alpha$ /IL-13/IFN- $\gamma$  cytokine cocktail supports prolonged MuSC proliferation *ex vivo* but  
56 induces differentiation.
- 57 • Cytokine cocktail regulates cell signaling with varied prolonged activation signatures.
- 58 • Effects of p38 $\alpha$ / $\beta$  inhibition on cytokine-induced MuSC expansion are stage-dependent.
- 59 • Soft hydrogels with late-stage p38 $\alpha$ / $\beta$  inhibition expand functional Pax7<sup>+</sup> MuSCs long-term.

60

61 **Short summary**

62 Cosgrove and colleagues develop a long-term muscle stem cell expansion protocol by combining a  
63 tunable stiffness hydrogel substrate, an inflammatory cytokine cocktail, and targeted inhibition of p38  
64 MAPK signaling. They show that soft, muscle-mimicking hydrogels with delayed p38 inhibition yield  
65 robust quantities of Pax7<sup>+</sup> functional muscle stem cells.

## 66 Introduction

67 Muscle stem cells (MuSCs; also called satellite cells) reside in skeletal muscle tissue in a myofiber-  
68 associated niche location and are essential for muscle homeostasis and regeneration throughout  
69 adulthood (Wang and Rudnicki, 2012). After muscle damage, quiescent MuSCs are activated and divide  
70 through self-renewal, yielding progeny that both retain a Pax7-expressing stem-cell phenotype and also  
71 differentiate into myogenic progenitor cells, which further commit into fusion-competent myocytes to  
72 repair damaged or lost myofibers (Almada and Wagers, 2016). This process of endogenous skeletal  
73 muscle regeneration involves the transient expansion of the MuSC population through self-renewal, as  
74 coordinated by a network of supporting cell types and factors, over the course of weeks, resolving in a  
75 return to stem-cell homeostatic quiescence (Bentzinger et al., 2013; Woszczyna and Rando, 2018).

76 Given their essential role in muscle regeneration, endogenous MuSCs and their culture progeny,  
77 a population of myogenic progenitors known as myoblasts, have been tested as a candidate for cell-  
78 based therapy for chronic muscle disease and wasting disorders, with limited clinical success (Almada  
79 and Wagers, 2016; Judson and Rossi, 2020). Notably, early-stage clinical trials using myoblasts  
80 demonstrated limited success in improving long-term muscle function to Duchenne muscular dystrophy  
81 patients, even though they resulted in detectable restoration of donor cell-derived dystrophin protein  
82 expression (Gussoni et al., 1992, 1997). These results are explained by myoblasts' poor survival,  
83 migration, and self-renewal/expansion capacity following intramuscular transplantation, unlike primary  
84 MuSCs which are endowed with these hallmark functional capacities when isolated from healthy adult  
85 donor tissue (Bouchentouf et al., 2007; Montarras et al., 2005; Sacco et al., 2008). Though strategies  
86 have been developed to enhance transplantation outcomes for myoblasts (Borselli et al., 2011; Rao et  
87 al., 2017; Sleep et al., 2017) and myogenic stem cells derived from induced pluripotent stem cells (Rinaldi  
88 and Perlingeiro, 2014) and mesangioblasts (Price et al., 2007), muscle stem cells remain an  
89 advantageous cell therapeutic candidate due to their restricted myogenic potential and robust self-  
90 renewal capacity.

91 *Ex vivo* expansion of functional muscle stem cells is a bottleneck to the use of endogenous  
92 MuSCs autologous or allogeneic cell therapies for systemic muscle wasting disorders or volumetric  
93 muscle loss (Judson and Rossi, 2020). Though protocols for FACS-based cell isolation have been  
94 refined, the scarcity of MuSCs *in vivo* (only ~2-5% of all skeletal muscle cells) relative to the number of  
95 MuSCs needed for transplantation therapies necessitates a robust expansion for clinical applications.  
96 Approximately  $10^3$  viable MuSCs can be isolated from a  $100 \text{ mm}^3$  biopsy (Blau and Webster, 1981).  
97 Though this number is sufficient to achieve functional recovery of small muscles in a dystrophic mouse  
98 model (Arpke et al., 2013), human transplantation will require a much larger number of cells. Based on  
99 prior clinical trials with myoblasts (Skuk, 2004), it is estimated that a cell therapy for DMD may require

100  $\sim 10^8$  functional MuSCs for individual muscles or  $\sim 10^{11}$  cells for whole-body therapies; this implies the  
101 need to expand *ex vivo* MuSCs isolated from muscle biopsies  $\sim 10^5$  to  $10^8$ -fold for therapeutic use in  
102 humans.

103         Given the propensity of isolated MuSCs from human and mouse tissue to differentiate and lose  
104 their stem-cell functions in traditional *ex vivo* culture platforms (Cosgrove et al., 2009; Lutolf et al., 2009),  
105 recent efforts have focused on developing biomolecular, pharmacological, and/or biophysical culture  
106 parameters to better support MuSC self-renewal and expansion outside the body. Recently, various  
107 culturing approaches have been utilized to stimulate *ex vivo* expansion of MuSCs in short- or  
108 intermediate-term cultures. Many small molecule and protein ligand factors have been shown to promote  
109 the expansion of adult mouse MuSCs, generally increasing functional Pax7-expressing cells  $\sim 2$ - $15$ -fold  
110 in short-term ( $\sim 1$  wk) cultures (Almada and Wagers, 2016; Judson and Rossi, 2020). These approaches  
111 typically stimulate pathways promoting self-renewal or inhibit pathways driving myogenic differentiation.  
112 Reported expansion factors include the non-canonical Wnt7a ligand (Le Grand et al., 2009), the cyclic  
113 AMP activator forskolin (Xu et al., 2013), and pharmacological inhibitors of p38 $\alpha/\beta$  mitogen-activated  
114 protein kinase (MAPK) (Bernet et al., 2014; Charville et al., 2015; Cosgrove et al., 2014), translational  
115 elongation factor eIF2- $\alpha$  (Lean et al., 2019; Zismanov et al., 2016), and the methyltransferase Setd7  
116 (Judson et al., 2018). Furthermore, culture substrate engineering approaches have demonstrated that  
117 substrate biophysical parameters and extracellular matrix proteins can influence MuSC self-renewal *ex*  
118 *vivo*. Soft hydrogel platforms (typically  $\sim 10$ - $12$  kPa Young's modulus) that mimic the rigidity of skeletal  
119 muscle tissues (which range from  $\sim 5$ - $40$  kPa, as reviewed in (Blau et al., 2015; Morrissey et al., 2016))  
120 have shown promise for permitting MuSC self-renewal (Cosgrove et al., 2014; Gilbert et al., 2010; Lutolf  
121 et al., 2009).

122         Notably, Fu et al. have demonstrated that MuSCs cultured in conditioned media from activated  
123 CD3<sup>+</sup> T-cells exhibit prolonged but infrequent MuSC expansion (Fu et al., 2015). Through profiling  
124 experiments, they observed that the inflammatory cytokines TNF- $\alpha$ , IL-1 $\alpha$ , IL-13, and IFN- $\gamma$  derived from  
125 activated T-cells were sufficient to induce MuSC expansion (Fu et al., 2015). TNF- $\alpha$  and IL-1 $\alpha$  are  
126 secreted by mast cells, T-cells, and neutrophils and stimulate NF $\kappa$ B and p38 $\alpha/\beta$  MAPK signaling (Chen  
127 et al., 2007; Egerman and Glass, 2014; Li et al., 2009; Yang and Hu, 2018). IL-13 is secreted by mast  
128 cells, T-cells, and eosinophils and predominantly activates STAT6 through type 2 innate signaling  
129 (Heredia et al., 2013; McCormick and Heller, 2015). IFN- $\gamma$  is produced by T-cells, B-cells, and NK-cells  
130 and induces STAT1 and STAT3 signaling (Castro et al., 2018; Qing and Stark, 2004; Schroder et al.,  
131 2004). These pathways have been associated with both promoting and antagonizing MuSC self-renewal  
132 function, so the mechanisms by which this cytokine mixture regulates MuSC expansion remain  
133 unresolved and could be further optimized. Likewise, the standard myogenic cell mitogen FGF2, which

134 is secreted by myofibers and myofibroblasts *in vivo*, and regulates p38 $\alpha$ / $\beta$ , MEK–ERK, AKT, and JNK  
135 signaling, exhibits a balance of self-renewal effects (Pawlikowski et al., 2017; Yablonka-Reuveni et al.,  
136 1999).

137 Here we tested whether long-term MuSC expansion protocols could be improved through a  
138 combined optimization of substrate biophysical parameters, expansion-promoting inflammatory cytokine  
139 factors, and targeted perturbation of related cell signaling pathways. We posited that combining these  
140 approaches may enhance the yield of functional MuSCs towards the scale needed for cell therapy  
141 applications. We show that, on soft, muscle-mimicking (12 kPa) hydrogel substrates, a mixture of the  
142 cytokines TNF- $\alpha$ , IL-1 $\alpha$ , IL-13, and IFN- $\gamma$  and the growth factor FGF2 stimulate exponential proliferation  
143 of adult mouse MuSCs over one month of culture, but these cells shift to committed myocyte phenotype.  
144 We found that inhibiting p38 $\alpha$ / $\beta$  signaling, which exhibits a phased activation in these long-term cultures,  
145 after three weeks, but not earlier, substantially enhances MuSC expansion and maintains stem cell-like  
146 transplantation potential. This new protocol integrating soft synthetic hydrogels with cytokine-stimulation  
147 and staged pathway perturbation achieves a  $\sim 10^8$ -fold expansion in Pax7<sup>+</sup> MuSCs over one month of  
148 culture, a significant improvement from established methods.

149 **Results**

150

151 **Physiologically relevant substrate stiffness differences influence negligible effects on MuSC**  
152 **phenotype in short-term cultures.** Given prior reports highlighting the importance of substrate stiffness  
153 in permitting MuSC self-renewal *ex vivo* (Gilbert et al., 2010), we hypothesized that subtle changes in  
154 substrate stiffness may influence the maintenance and expansion mouse MuSCs over a short-term (~1  
155 wk) culture duration. We utilized a poly(ethylene glycol) (PEG) hydrogel system as a culture platform  
156 (Cosgrove et al., 2014; Gilbert et al., 2010; Lutolf and Hubbell, 2003). By varying the PEG weight  
157 percentage from 2.5% to 4.5%, we observed that the elastic stiffness (quantified by Young's modulus  
158 through shear rheometry) of the PEG hydrogels ranged between 4.7 and 35 kPa (**Fig. S1A**). This range  
159 of moduli facilitated examination of the role of physiological stiffness on MuSC phenotype, as it covers  
160 stiffnesses inclusive of young adult (2-mo) mouse (~10-18 kPa), aged adult (18-mo) mouse (~20-30 kPa),  
161 and dystrophic adult mouse muscles (~40 kPa), as well as cultured myocytes and myotubes (Blau et al.,  
162 2015; Collinsworth et al., 2002; Cosgrove et al., 2009; Engler et al., 2004, 2006; Gao et al., 2008; Gilbert  
163 et al., 2010; Rosant et al., 2007; Stedman et al., 1991; Yin et al., 2013). We functionalized the PEG  
164 hydrogel for cell adhesion by conjugating the MuSC niche protein laminin (Sanes, 2003) via surface  
165 Michael addition reaction. We observed that the concentration of surface-conjugated laminin, as  
166 measured by immuno-chemiluminescence detection, was not affected by the PEG weight percentage  
167 (**Fig. S1B**).

168 Using an established FACS protocol (Sacco et al., 2008), we isolated CD34<sup>+</sup> α7-Integrin<sup>+</sup> MuSCs  
169 from the hindlimb muscles of adult (3-4 mo) C57BL/6J mice and cultured them in standard myogenic  
170 "growth medium" containing the myogenic mitogen FGF2 (referred to hereon as FGF) on laminin-  
171 conjugated hydrogels ranging from 5 to 60 kPa (**Fig. 1A**). After 7 days of culture, we observed no  
172 significant differences in MuSC morphology between substrates of different stiffness (**Fig. 1B**), or in  
173 proliferation index by counting cells (**Fig. 1C**). To characterize the MuSC phenotype, we analyzed  
174 expression of hallmark myogenic genes at 7 d by RT-qPCR (**Fig. 1D-G**). In the range of 5-60 kPa, we  
175 observed no statistically significant differences in expression of both *Pax7*, an essential transcription  
176 factor in quiescent and self-renewing MuSCs, and *Myod1*, a myogenic differentiation factor, between any  
177 modulus values (**Fig. 1D, F**). We observed subtle but statistically significant changes between very soft  
178 (5 kPa) and stiff (30-60 kPa) substrates in the expression of *Myf5*, a MuSC activation factor, and *MyoG*,  
179 a myogenic commitment factor (**Fig. 1D-G**). These results suggest differences in substrate stiffness are  
180 insufficient to induce substantial changes in MuSC phenotypes in short-term PEG hydrogel cultures, and  
181 that a range of muscle-mimetic (5-60 kPa Young's modulus) substrates may provide similarly permissive  
182 environments for *ex vivo* MuSC maintenance.

183

184 **Long-term cytokine treatment enhances MuSC proliferative yield while reducing stemness gene**  
185 **expression.** Several approaches, including the inhibition of p38 $\alpha$ / $\beta$  MAPK (Bernet et al., 2014; Charville  
186 et al., 2015; Cosgrove et al., 2014) and exogenous stimulation with a combination of inflammatory  
187 cytokines TNF- $\alpha$ , IL-1 $\alpha$ , IL-13, and IFN- $\gamma$  (Fu et al., 2015), have been shown to promote MuSC  
188 proliferation in short- and intermediate-term cultures, respectively. We thus hypothesized that these  
189 strategies, when applied to cells maintained on soft hydrogels for long-term cultures, might synergistically  
190 enhance MuSC proliferation while maintaining their stem-cell phenotype, and thus yield an expansion of  
191 stem cell numbers. Here, we use these culture term definitions: short (1 wk), intermediate (2-3 wk), and  
192 long (4-6 wk). Given the minor differences in short-term maintenance of MuSC phenotype at 5-60 kPa  
193 (**Fig. 1**), we chose to perform long-term culture experiments on 12-kPa hydrogels as representative of  
194 soft, muscle-mimetic substrates.

195 We cultured adult MuSCs on laminin-conjugated 12 kPa hydrogels in growth medium containing  
196 FGF. We further supplemented the growth medium with SB203580 (a p38 $\alpha$ / $\beta$  MAPK inhibitor, hereafter  
197 referred to as p38i) and/or a mix of TNF- $\alpha$ , IL-1 $\alpha$ , IL-13, and IFN- $\gamma$  (hereafter referred to as “cytokine mix”  
198 or “cyt. mix”). Cells were passaged every 6 d, reseeded on new hydrogels, and tracked by extrapolating  
199 total cell counts from each passage. We detected significant differences between the conditions in total  
200 cell yield at 4 wk (**Fig. 2A**). p38 $\alpha$ / $\beta$  inhibition alone increased proliferation relative to the FGF-only controls  
201 and resulted in 10<sup>4</sup>-fold total cell yield relative to initial seeding. The cytokine mix had a larger proliferative  
202 effect, resulting in 10<sup>9</sup>-fold total yield. At 2 wk, we observed increased elongation and fusion of cells in  
203 the presence of the cytokine mix, whereas p38 $\alpha$ / $\beta$  inhibition alone did not alter cell morphology compared  
204 to the FGF-only controls, suggesting that the cytokine stimulation may promote myogenic cell activation  
205 and commitment (**Fig. 2B**).

206 We performed similar experiments with stiff 60-kPa hydrogels, and observed minimal differences  
207 in total cell yield at 4 wk for each of the FGF-only, p38 $\alpha$ / $\beta$  inhibition, and cytokine mix conditions between  
208 12 kPa and 60 kPa hydrogels, indicating substrate rigidity has a negligible effect on long-term MuSC  
209 proliferation for these conditions (**Fig. S2A**). Notably, when we combined the cytokine mix with p38 $\alpha$ / $\beta$   
210 inhibition throughout the culture duration to test if they exhibit additive effects, the total cell yield at 4 wk  
211 was 10-fold less than the yield from the cytokine mix alone (**Fig. 2B**). As such, we conclude the cytokine  
212 mix enhances proliferation throughout the long-term culture, but the effect does not synergize with long-  
213 term p38 $\alpha$ / $\beta$  inhibition. We also investigated the long-term effects of p38i and the cytokine mix on MuSCs  
214 isolated from dystrophic (*mdx*) mice. We detected increases in total cell yield similar to the wild-type  
215 control MuSCs in the presence of the cytokine mix at 4 wk, but in contrast p38i had no proliferative benefit  
216 for *mdx* MuSCs relative to FGF-only growth medium (**Fig. S2B**).



217 To assay the myogenic phenotype during long-term cytokine mix-stimulated hydrogel cultures,  
218 we analyzed the expression of *Pax7*, *Myf5*, and *Myog* using RT-qPCR (**Fig. 2C-F**). We found significantly  
219 lower expression of *Pax7*, negligible differences in *Myf5*, and higher expression of *Myog* at 4 wk relative  
220 to 2 wk (**Fig. 2C-E**). After 2 wk, MuSCs treated with cytokine mix expressed higher levels of *Myf5* relative  
221 to control (**Fig. 2F**) and this effect was amplified with inhibition of p38 $\alpha$ / $\beta$ . These results indicate that in  
222 long-term culture on soft hydrogels, the TNF- $\alpha$ /IL-1 $\alpha$ /IL-13/IFN- $\gamma$  cytokine mix induces a progressive shift  
223 towards commitment and maturation, and thus enhances proliferation at the expense of a stem-cell  
224 phenotype. The addition of prolonged p38 $\alpha$ / $\beta$  inhibition attenuates proliferative yield but preserves  
225 intermediate-term expression of *Myf5*, suggesting an enhanced activated progenitor phenotype.

226

227 **Cytokine stimulation induces time-varying activation of intracellular signaling pathways in long-**  
228 **term soft hydrogel culture.** As summarized in **Fig. S3A**, TNF- $\alpha$ , IL-1 $\alpha$ , IL-13, IFN- $\gamma$ , and FGF2 stimulate  
229 the activation of varied intracellular signaling pathways in muscle stem and progenitor cells with  
230 conflicting effects on proliferation and self-renewal (Chen et al., 2007; Heredia et al., 2013; Loiben et al.,  
231 2017; Palacios et al., 2010; Qing and Stark, 2004; Yang and Hu, 2018). We hypothesized that selectively  
232 blocking individual anti-proliferative and/or pro-differentiation pathways might enhance cytokine mix-  
233 induced cell yields. To this end, we examined short-term MuSC proliferation induced by cytokine mix  
234 treatment on 12 kPa hydrogels in combination with a panel of small molecule inhibitors of the signaling  
235 mediators MEK, JNK, STAT3, p38 $\alpha$ / $\beta$ , AKT, JAK2 and IKK (**Fig. S2C**). None of these inhibitors enhanced  
236 MuSC proliferation relative to the cytokine mix by itself, and most diminished MuSC proliferation (**Fig.**  
237 **S2C**), suggesting multiple downstream pathways (JAK2–STAT3, p38 $\alpha$ / $\beta$ , AKT, and IKK–NF $\kappa$ B) are all  
238 critical for the net pro-proliferative effect of the cytokine mix.

239 Given these attenuating effects of individual pathway inhibition on cytokine-induced proliferation,  
240 we sought to characterize the signaling dynamics of key intracellular signaling pathways in myogenic  
241 cells stimulated by the cytokine mix (**Fig. S3A**). We cultured primary myoblasts, the committed myogenic  
242 progenitors downstream from MuSCs, on laminin-conjugated 12 kPa hydrogels for 30 min in the presence  
243 of the cytokine mix and observed robust activation of phospho-STAT1, phospho-STAT3, phospho-  
244 STAT6, and phospho-NF $\kappa$ B by immunoblotting, verifying that the cytokine mix activates its canonical  
245 pathways as short term responses (**Fig. S3B-H**). Thus, we hypothesized that similar pathways may be  
246 activated in long-term MuSC culture in our platform, and that their temporal activation dynamics may  
247 shed light on their roles in long-term MuSC proliferation and differentiation outcomes. MuSCs were  
248 cultured on laminin-conjugated 12 kPa hydrogels for five weeks in the presence of the exogenous  
249 cytokine mix and lysates were collected weekly for phosphoprotein measurements before passaging  
250 (**Fig. 3A**). We used the Luminex multiplexable bead-based platform to measure expression levels of key

251 phosphorylated signaling molecules including phospho-AKT, phospho-ERK1/2, phospho-cJun, phospho-  
252 STAT3, phospho-IkBa, phospho-p38 $\alpha$ / $\beta$ , phospho-HSP27, and phospho-STAT1 (all normalized each to  
253  $\beta$ -actin) at each time point. We observed three distinct patterns of phosphoprotein activation dynamics  
254 over the long-term culture duration (**Fig. 3B**). First, we detected a delayed biphasic activation signature  
255 for phospho-AKT that peaks at 2 wk, returns to baseline at 3 wk, and then continually increases thereafter  
256 (**Fig. 3C**). Second, we detected a sustained activation response signature for phospho-ERK1/2, phospho-  
257 cJun, phospho-STAT3, and phospho-IkBa that peaks around 1 wk and then attenuates over time (**Fig.**  
258 **3D**). Third, we detected an oscillatory activation signature for phospho-p38 $\alpha$ / $\beta$  and its downstream  
259 effector phospho-HSP27 that peaks at 1 wk, 3 wk and 5 wk (**Fig. 3E**).

260 Previous reports have shown that p38 $\alpha$ / $\beta$  induces the activation of quiescent MuSCs (Jones et  
261 al., 2005), but also prolonged p38 $\alpha$ / $\beta$  activity contributes to cell cycle exit and induction of myogenic  
262 commitment through post-translational regulation of MyoD (Blau et al., 2015; Lluís et al., 2006; Loiben et  
263 al., 2017; Perdiguero et al., 2007; Segalés et al., 2016). These distinct functional roles raise the possibility  
264 that the initial phase of p38 $\alpha$ / $\beta$  activation within 1 week of culture may be critical for short-term activation  
265 and proliferation, whereas p38 $\alpha$ / $\beta$  may promote myogenic differentiation in later phases. We reason that  
266 repression of p38 $\alpha$ / $\beta$ -mediated MuSC activation in the first week of culture may explain the diminished  
267 the total cellular yield for the p38 $\alpha$ / $\beta$ -inhibited cytokine mix condition (**Fig. 2B**).

268

269 **Late-stage inhibition of p38 $\alpha$ / $\beta$  signaling enhances MuSC phenotype in long-term expansion**  
270 **cultures.** Based on these p38 $\alpha$ / $\beta$  activation dynamics, we posited that temporally-staged inhibition of  
271 p38 $\alpha$ / $\beta$  may improve stem-cell expansion in long-term MuSC cultures on 12-kPa hydrogels stimulated  
272 with the cytokine mix. To test this, we cultured adult MuSCs for up to 6 weeks in FGF2 growth medium  
273 with or without the cytokine mix and initiated p38i at distinct time points matching each of the passaging  
274 events (**Fig. 4A**).

275 Without cytokine mix, the final total cell yield at 5 weeks was elevated for constant p38i (starting  
276 at d 0) relative to no inhibition or when p38i was started at 3 weeks (**Fig. 4B, S4A**). Expression of both  
277 the stemness gene *Pax7* and the maturation gene *Myh2* after 6 weeks were diminished by p38i starting  
278 at either 0 or 3 weeks, suggesting that long-term p38i in the absence of cytokine mix-stimulation skews  
279 MuSC progeny away from a myogenic phenotype (**Fig. 4C**). With cytokine mix, we observed that constant  
280 p38i administration suppressed total cell yield by nearly 10-fold and had negligible effects on *Pax7* and  
281 *Myh2* gene expression (**Fig. 4B-C**). Notably, this cell yield suppression was not observed for any delayed  
282 p38i condition, suggesting that permitting p38 $\alpha$ / $\beta$  activation in the first week of cytokine mix culture  
283 improves long-term cell yield. Moreover, delaying the p38i addition until 2 weeks or later of culture  
284 enhanced total cell yield above the cytokine mix baseline by a factor of 5-12 $\times$ . Similar effects were

285 observed in myogenic gene expression; delaying p38i addition until 3-4 weeks of culture enhanced *Pax7*  
286 expression and reduced *Myh2* expression, relative to cytokine mix-only controls. These results show that  
287 delaying p38 $\alpha$ / $\beta$  inhibition to around 3 weeks of culture enhances MuSC proliferation and stem-cell gene  
288 expression while restricting maturation in long-term cytokine mix-stimulated soft hydrogel cultures.

289

290 **Enhanced MuSC phenotype with late-stage p38 $\alpha$ / $\beta$  inhibition is contingent on soft hydrogel**  
291 **substrates.** To examine the dependency of this enhanced long-term expansion on substrate rigidity, we  
292 cultured MuSCs isolated from adult transgenic *Pax7-zsGreen* mice (Bosnakovski et al., 2008) on 12 and  
293 60 kPa laminin-conjugated hydrogels with cytokine mix supplementation, with or without late-stage  
294 p38 $\alpha$ / $\beta$  inhibition (from d 21), for five weeks (**Fig. 5A**). MuSCs exposed to late-stage p38i on 12 kPa gels  
295 had a distinct, unfused morphology, relative to cells cultured on 60 kPa gels or without p38i (Fig. 5B). In  
296 both 12 and 60 kPa conditions, p38 $\alpha$ / $\beta$  inhibition significantly increased the cumulative cell yield at five  
297 weeks, but there was no difference in total yield between any 12 and 60 kPa conditions (**Fig. 5C-D**).

298 We performed RT-qPCR at each passage throughout the long-term culture to examine the  
299 dynamics of myogenic differentiation. We found that *Myf5*, a marker of MuSC activation, remained  
300 elevated and that *Myog*, a myogenic commitment marker, remained suppressed only in the 12 kPa late-  
301 stage p38i condition (**Fig. 5E-F**), suggesting the soft but not stiff substrates with late-stage p38 $\alpha$ / $\beta$   
302 inhibition sustain an activated MuSC phenotype.

303 For the late-stage p38i 12-kPa condition, we analyzed zsGreen transgene expression by live-cell  
304 microscopy as a more direct measure of Pax7-expressing MuSC cells (**Fig. 5G-H**). The frequency of  
305 Pax7-zsGreen<sup>+</sup> cells ranged between ~0.2-5.4% throughout the long-term culture but specific differences  
306 between timepoints were not statistically significant (**Fig. 5G**). By comparing to the extrapolated total cell  
307 yield, we estimate that this protocol yields ~10<sup>9</sup>-10<sup>10</sup> Pax7-zsGreen<sup>+</sup> cells by 5 weeks from each sorted  
308 and seeded MuSC at d 0 (**Fig. 5G**). These results suggest the soft (12 kPa) hydrogel substrate with late-  
309 stage p38 $\alpha$ / $\beta$  inhibition permits robust and prolonged expansion of an activated MuSC population,  
310 whereas the stiffer (60 kPa) substrate is able to support similar yields but with a more committed  
311 myogenic cell phenotype.

312

313 **Cytokine mix with late-stage p38 $\alpha$ / $\beta$  inhibition maintains MuSC engraftment potential in long-term**  
314 **culture.** Pax7 expression status is a hallmark of the stem cell phenotype of MuSCs, but confirmation of  
315 MuSC functionality requires *in vivo* transplantation assay. To determine whether the long-term culture  
316 protocol maintains functional MuSCs, we performed a sensitive *in vivo* transplantation engraftment assay  
317 (Cosgrove et al., 2014; Gilbert et al., 2010; Sacco et al., 2008) on MuSCs during long-term cultures. We

318 isolated MuSCs from adult *Luciferase* transgenic donor mice and cultured them on 12 or 60 kPa laminin-  
319 conjugated hydrogels with cytokine mix supplementation and with or without late-stage (weeks 3-5)  
320 p38 $\alpha$ / $\beta$  inhibition. We collected cells at 3 or 5 weeks of culture and transplanted 500 cells into  
321 immunocompromised *NSG* recipient mice (**Fig. 6A**). One month post-transplantation, we measured *in*  
322 *vivo* cell engraftment using a bioluminescent imaging (BLI) assay that is sensitive to individual myofiber  
323 engraftment events (Cosgrove et al., 2014; Sacco et al., 2008). Mice transplanted with MuSCs cultured  
324 on 12 kPa hydrogels with cytokine mix for 3 wk exhibited substantial engraftment (67% of transplants),  
325 but cells from 5 wk did not (0%), suggesting that functional MuSCs were no longer present at the end of  
326 the culture protocol (**Fig. 6B**). In contrast, if p38 $\alpha$ / $\beta$  was inhibited from 3-5 wk under this condition, we  
327 observed robust engraftment outcomes at similar frequencies (100%) and levels as from 3 wk of cytokine  
328 mix culture, suggesting that late-stage p38i extends the preservation of MuSCs function to 5 wk. We  
329 observed similar results for MuSCs cultured on the stiffer 60 kPa hydrogels, though the engraftment  
330 levels were reduced relative to the 12 kPa conditions. Critically, we observed negligible engraftment  
331 frequencies for MuSCs cultured on traditional laminin-coated tissue-culture polystyrene substrates (~3  
332 GPa Young's modulus (Carragher Jr., 2016)) with cytokine mix treatment, regardless of p38 $\alpha$ / $\beta$  inhibition  
333 (**Fig. S5A-B**). These results indicate soft substrates (~12 kPa) permit maintenance of a stem cell-like  
334 engraftment potential for up to 5 weeks of culture in the presence of the cytokine mix and late-stage  
335 p38 $\alpha$ / $\beta$  inhibition, but more rigid substrates are not permissive to this preservation of functional MuSC  
336 potential during long-term cultures.

337 **Discussion**

338 This work presents an advance in long-term *ex vivo* MuSC expansion methods. We demonstrated that a  
339 TNF- $\alpha$ /IL-1 $\alpha$ /IL-13/IFN- $\gamma$  cytokine mix supplement to standard FGF2-containing myogenic growth  
340 medium supports the proliferative expansion of muscle stem cells *ex vivo*, which are capable potent  
341 engraftment function *in vivo*, and these outcomes are optimized on soft, muscle-mimicking (~12 kPa)  
342 culture substrates in combination with a delayed inhibition of the p38 $\alpha$ / $\beta$  MAPK signaling pathway (**Fig.**  
343 **6C**). Together, our data suggest that the expanded cells under the late-stage p38i condition contain a  
344 heterogenous population of Pax7<sup>+</sup> stem cells (~1%, using a sensitive Pax7-zsGreen reporter system)  
345 and activated stem/progenitor cells, with infrequent committed or fused cells (**Fig. 5**). Intriguingly, we  
346 observed enhanced transplantation potential for MuSCs maintained on 12 kPa laminin-conjugated  
347 hydrogels compared to laminin coated plastic, suggesting substrate rigidity can modulate long-term  
348 engraftment potential of MuSCs, as has been reported previously for short-term cultures (Gilbert et al.,  
349 2010). In our short-term studies, we did not observe substantial differences in MuSC phenotype between  
350 5-60 kPa substrates, though the bulk MuSC phenotype assays reported in **Fig. 1** may not sufficiently  
351 distinguish between the early self-renewal division differences within the 2-40 kPa range that were  
352 reported by Gilbert et al.

353 Our findings suggest that chronic administration of the TNF- $\alpha$ /IL-1 $\alpha$ /IL-13/IFN- $\gamma$  cytokine mix is a  
354 potent driver of exponential MuSC proliferation for at least one month of culture, in agreement with Fu et  
355 al. (Fu et al., 2015). These cytokines are not chronically present in homeostatic muscles, and instead are  
356 dynamically regulated with the transient cycles of T-cell infiltration during healthy muscle regeneration  
357 processes (De Micheli et al., 2020; Tidball, 2017). The prolonged cytokine stimulation protocol tested  
358 herein drives a diverse set of signaling network activation signatures, including phosphoprotein pathways  
359 with delayed, biphasic, or oscillatory dynamics (**Fig. 3**). Most of these cytokine-induced signaling  
360 pathways provide critical pro-proliferative contributions in the initial phase of MuSC proliferation (**Fig.**  
361 **S2C**), and may also be responsible for the observed shift towards a Myosin Heavy Chain-expressing  
362 population of committed myocytes and myotubes in the late culture stages (**Figs. 4C and 5F**).

363 Notably, we found that the p38 $\alpha$ / $\beta$  pathway exhibited a prolonged oscillatory activation signature  
364 and that a delayed pharmacological inhibition of p38 $\alpha$ / $\beta$  ameliorated its pro-differentiation effects and  
365 permitted MuSC function in long-term cultures. These findings are in agreement with prior reports in  
366 short-term culture models (Bernet et al., 2014; Charville et al., 2015; Cosgrove et al., 2014; Jones et al.,  
367 2005; Palacios et al., 2010) and p38 $\alpha$ -specific genetic ablation studies (Brien et al., 2013) demonstrating  
368 that the p38 $\alpha$ / $\beta$  pathway drives both myogenic proliferation and differentiation. Further, our observations  
369 suggest that p38 $\alpha$ / $\beta$  exhibits temporally disparate effects in the regulation of MuSC self-renewal and  
370 differentiation under this cytokine mix long-term culture system. We have previously observed, through

371 data-modeling of myoblast cell fates, that the p38 $\alpha$ / $\beta$  pathway exhibits time-varying effects on myogenic  
372 proliferation and commitment in short-term (~24 hr) stimulation periods (Loiben et al., 2017). These  
373 findings further suggest that p38 $\alpha$ / $\beta$  pathway dynamics may encode differing consequences for myogenic  
374 outcomes; thus, more time-resolved inhibition strategies may provide further enhancement of MuSC  
375 expansion outcomes. Similarly, combinatorial targeting of other signaling pathways, such as through  
376 inhibition of STAT3 signaling (Price et al., 2014; Tierney et al., 2014), may further support MuSC self-  
377 renewal in long-term cytokine mix cultures.

378 Likewise, this protocol may be further enhanced through strategies to promote a shift toward a  
379 more quiescent MuSC population before transplantation. Recently, Sampath et al. have reported  
380 oncostatin-M (OSM) promotes MuSC quiescence through cell-cycle exit and enhances their serial  
381 transplantation potential (Sampath et al., 2018). Addition of OSM or other pro-quiescence strategies  
382 (Quarta et al., 2016), possibly timed in a manner that better mimics the *in vivo* dynamics of the post-injury  
383 return to homeostasis, may provide a synergistic improvement in MuSC functional potency in long-term  
384 expansion cultures. Moreover, *ex vivo* expansion strategies such as presented here could be combined  
385 with cell delivery technologies consisting of synthetic and/or natural material (Davoudi et al., 2018; Han  
386 et al., 2018; Rao et al., 2017; Sleep et al., 2017; Wolf et al., 2015) to improve cell-engraftment outcomes  
387 and functional recovery endpoints. The advances presented in this work provide an *ex vivo* MuSC  
388 expansion protocol capable of reaching the high-yield functional expansion demands for clinical muscle  
389 cell therapy applications. Further optimization of this technology and its extension to human muscle stem  
390 cells from healthy and diseased patients could help realize MuSC-based therapies for chronic muscle  
391 diseases.

## 392 **Materials and Methods**

393

394 **Mice.** The Cornell University Institutional Animal Care and Use Committee (IACUC) approved all animal  
395 protocols and experiments were performed in compliance with its institutional guidelines. Mouse housing  
396 and husbandry was conducted in vivaria managed by the Cornell Center on Animal Research and  
397 Education or as service from the Cornell Progressive Assessment of Therapeutics (PATH) Facility (for  
398 NSG mice). C57BL/6J wildtype and dystrophic *mdx* (C57BL/10ScSn-*Dmd*<sup>*mdx*</sup>/J) mice were obtained from  
399 Jackson Laboratory (# 000664 and # 001801, respectively). *Pax7-zsGreen* transgenic mice (Bosnakovski  
400 et al., 2008) were a generous gift from M. Kyba (University of Minnesota). These strains were maintained  
401 heterozygously on a C57BL/6J background, routinely genotyped, and bred in-house. Transplant  
402 experiments used transgenic *Luciferase* mice (FVB-Tg(CAG-luc,-GFP)L2G85Chco/J; Jackson  
403 Laboratory # 008450) as donors and immunodeficient NOD/Scid/IL2Rg<sup>null</sup> (NSG) (NOD.Cg-*Prkdc*<sup>*scid*</sup>  
404 *Il2rg*<sup>*tm1Wjl*</sup>/SzJ; Jackson Laboratory # 005557) as recipients. All experiments used adult 3-5 month-old  
405 mice. A random mixture of male and female mice was used in each experiment, except for the *mdx*  
406 studies for which only male mice were used, with n = 3-4 donor mice pooled for each MuSC isolation.

407

408 **MuSC isolation.** MuSCs were isolated by FACS from the hindlimbs muscles of adult mice following  
409 established protocols (Sacco et al., 2008). In brief, following dissociation and magnetic depletion, MuSCs  
410 were prospectively isolated using a (propidium iodide/CD45/CD11b/CD31/Sca1)<sup>-</sup> CD34<sup>+</sup> α7-integrin<sup>+</sup> cell  
411 sorting gate. In detail, we euthanized mice with isoflurane and harvested tibialis anterior, quadriceps, and  
412 gastrocnemius muscles. Muscles were digested with 2.5 mg ml<sup>-1</sup> Collagenase D (Sigma-Aldrich #  
413 11088866001) and 0.04 U ml<sup>-1</sup> Dispase II (Sigma-Aldrich # 04942078001) followed by dissociation using  
414 a gentleMACS system (Miltenyi Biotec # 130-093-235). Cell suspensions were filtered through 100 and  
415 40 μm filters (Corning Cellgro # 431752 and #431750) to remove myofiber debris. Erythrocytes were  
416 removed through incubation in erythrocyte lysis buffer (IBI Scientific # 89135-030) supplemented with  
417 0.1% DNase (Omega Bio-Tek # E1091-02). Cell suspensions were stained with biotinylated antibodies  
418 against CD45 (Biolegend # 103104), CD31 (Biolegend # 102404), CD11b (Biolegend # 101204), and  
419 Sca1 (Biolegend # 108104) for 15 min at 4°C, washed, and then stained with streptavidin-conjugated  
420 magnetic beads (Miltenyi Biotec # 130-048-102), streptavidin-PE/Cy7 (Biolegend # 405206), and  
421 antibodies against α7-integrin (Alexa Fluor 647; AbLab # 67-0010-05), CD34 (eFluor 450; Thermo Fisher  
422 Scientific # 48-0341-82) for 20 min at 4°C. (CD45/CD11b/CD31/Sca1)-positive cells were depleted by  
423 passage through LS selection columns (Miltenyi Biotec # 130-042-401). All washes, staining steps, and  
424 resuspension for FACS was performed in a FACS buffer solution containing 5% goat serum (Jackson  
425 Immunoresearch #005-000-121) and 1 mM EDTA in 1× phosphate buffer saline (PBS). Suspensions

426 were stained with propidium iodide (PI, Thermo Fisher Scientific # P3566) immediately prior to FACS.  
427 FACS was performed on an FACS Aria Fusion sorter (BD Biosciences).

428

429 **Hydrogel fabrication.** Engineered 2D basal lamina constructs were developed using previously  
430 established methods (Cosgrove et al., 2014; Gilbert et al., 2010; Lutolf and Hubbell, 2003). 10 kDa  
431 molecular weight 4-arm polyethylene glycol (PEG)-thiol (PEG-VS; JenKem # A7008-1) and 10 kDa 8-  
432 arm PEG-vinyl sulfone (PEG-SH; JenKem # A10033-1) were dissolved triethanolamine and DI water,  
433 respectively, at 10% wt/vol. Precleaned glass slides were coated with a thin layer of Sigmacote (Sigma-  
434 Aldrich, # SL2-100ML) and baked for 4 h at 80°C. PEG-SH and PEG-VS were briefly mixed at a 2:1 ratio  
435 in sufficient TEOA to match desired PEG wt% and 150  $\mu$ L aliquots were pipetted onto a baked glass  
436 slide, with another slide placed on top of two 0.8 mm plastic spacers. The whole assembly was secured  
437 with binder clips and incubated for 12 min at 37°C. The setup was then disassembled, and the solidified  
438 gels were each coated with 30  $\mu$ L of a pre-dialyzed laminin (0.125  $\mu$ g  $\mu$ L<sup>-1</sup> in 1 $\times$  PBS; Thermo Fisher  
439 Scientific, # 23017015). The gels were incubated for 50 min to complete the laminin conjugation reaction  
440 and then were attached to the bottoms of 24-well tissue-culture plastic plates with 10  $\mu$ L of the PEG-  
441 SH/PEG-VS/TEOA mixture per gel. Gels were stored at 4°C in PBS with 1% antibiotic-antimycotic  
442 (Corning Cellgro # 30-004-CI) for up to 1 wk. Gels were washed with cell culture medium 3 $\times$  prior to cell  
443 seeding.

444

445 **Rheological testing of hydrogels.** Rheological testing was performed at the Cornell Energy Systems  
446 Institute using an Anton Paar MCR rheometer (both 301 and 501 models). For ease of handling and  
447 testing, the machine was configured to perform rheology using 10-mm diameter parallel plate settings.  
448 Hydrogels were kept in PBS with 1% antibiotic-antimycotic prior to testing to avoid dehydration. Shear  
449 rheometry was performed with minimal compression ( $\leq 0.1$  N) to achieve no-slip shear measurements at  
450 5% angular shear strain percentage and a 60–0.6 Hz oscillation frequency range with 8 points per decade  
451 analyzed in the frequency range. Storage ( $G'$ ) and loss ( $G''$ ) modulus values were calculated and  
452 converted to a Young's modulus ( $E$ ) values for hydrogels following  $E = 2G(1+\nu)$  where  $G$  is the shear  
453 storage modulus at 6 Hz and  $\nu$  represents the hydrogel's Poisson ratio, estimated to be 0.5. The mean  
454 Young's modulus from  $n = 3$  independent replicates was related to the PEG weight percentage (**Fig.**  
455 **S1A**) by fitting to a 4-PL model, which was used to identify PEG weight percentages needed to achieve  
456 targeted moduli.

457

458 **Protein incorporation assays of hydrogels.** PEG hydrogels were synthesized at 3.0, 4.0, or 5.0 wt%  
459 PEG and were conjugated as described above with 4  $\mu$ g cm<sup>-2</sup> of dialyzed laminin in 1 $\times$  PBS. Gels were



460 incubated with cysteamine (Sigma-Aldrich # 30070-10G) for 1 h to terminate unreacted PEG-VS arms  
461 and then rinsed with 0.05% Tween-20 in 1× Tris-buffered saline (TBS-Tween). Hydrogels were blocked  
462 with 5% bovine serum albumin (BSA) in TBS-Tween for 2 h, then washed twice with TBS-Tween.  
463 Hydrogels were then incubated with an anti-laminin antibody (1:200 dilution in 1% BSA; Sigma-Aldrich #  
464 L9393) for 1 h, then washed five times with TBS-Tween. Wells were then incubated with peroxidase-  
465 conjugated goat anti-rabbit secondary antibody (1:500 dilution in 1% BSA; Jackson Immunoresearch #  
466 111-035-144) for 1 h, then washed five times with TBS-Tween. Hydrogels were incubated in ECL reagent  
467 (1:1 mix of luminol/HRP substrate solutions; Bio-Rad # 1705062) for 1 min and then imaged for 300 s  
468 using the ChemiDoc imaging system (Bio-Rad # 17001401). Dialyzed laminin was adsorbed directly to  
469 wells to generate a standard reference curve for quantitation. Luminescence images were analyzed using  
470 ImageLab (Bio-Rad) software.

471

472 **Short-term MuSC culture.** Isolated MuSCs were seeded at 1000 cells  $\text{cm}^{-2}$  on laminin-conjugated 5,  
473 12, 20, 30, or 60 kPa Young's modulus PEG hydrogels in 24-well plates. MuSCs were cultured in 2 mL  
474 myogenic growth medium (GM) containing 43% Dulbecco's Modified Eagle's Medium (DMEM; Corning  
475 Cellgro # 10-013), 40% Ham's F-10 (Corning Cellgro # 10-070-CV), 15% fetal bovine serum (Corning  
476 Cellgro # 35-010-CV), 1% Penicillin-Streptomycin (Corning Cellgro # 30-002-CI), 1% L-glutamine  
477 (Corning Cellgro # 25-005), and 2.5 ng  $\text{mL}^{-1}$  recombinant mouse FGF2 (R&D Systems # 3139-FB-025).  
478 In some experiments, a mix of recombinant mouse cytokines: 10 ng  $\text{mL}^{-1}$  TNF- $\alpha$  (R&D Systems # 410-  
479 MT-010), 10 ng  $\text{mL}^{-1}$  IL-1 $\alpha$  (R&D Systems # 400-ML-005), 10 ng  $\text{mL}^{-1}$  IL-13 (R&D Systems # 413-ML-  
480 005), and 10 ng  $\text{mL}^{-1}$  IFN- $\gamma$  (R&D Systems # 485-MI-100) was added. For pathway inhibition studies, the  
481 following chemicals were added: 5  $\mu\text{M}$  SB203580 (p38 $\alpha/\beta$  MAPK inhibitor; Selleck Chemicals # S1076),  
482 10 nM PD0325901 (MEK1/2 inhibitor; Selleck Chemicals # S1036), 1  $\mu\text{M}$  SP600125 (pan-JNK inhibitor;  
483 Selleck Chemicals # S1460), 5  $\mu\text{M}$  5,15-diphenyl-porphine (STAT3 inhibitor; Sigma-Aldrich # D4071), 10  
484 nM GSK2110183 (AKT1/2/3 inhibitor; Selleck Chemicals #S7521), 1  $\mu\text{M}$  AG-490 (JAK2 inhibitor with  
485 effects on EGFR kinase; Selleck Chemicals # S1143), or 10  $\mu\text{M}$  BMS-345541 (IKK-1/2 inhibitor; Selleck  
486 Chemicals # S8044), all resuspended in 0.1% DMSO final concentration. Media was replenished every  
487 2 d. At 7 d, cells were lifted from gels using 0.25% Trypsin/0.1% EDTA (Corning Cellgro # 25-053-CI)  
488 and quenched with GM. Samples were counted using a hemocytometer or lysed for RNA isolation.

489

490 **Long-term MuSC culture.** Isolated MuSCs were seeded at 1000 cells  $\text{cm}^{-2}$  on laminin-conjugated 12 or  
491 60 kPa PEG hydrogels in 24-well plates. MuSCs were cultured in 2 mL myogenic growth medium (GM)  
492 with FGF2 as described above. For some experiments, a mix of recombinant mouse cytokines (10 ng  
493  $\text{mL}^{-1}$  TNF- $\alpha$ , 10 ng  $\text{mL}^{-1}$  IL-1 $\alpha$ , 10 ng  $\text{mL}^{-1}$  IL-13, 10 ng  $\text{mL}^{-1}$  IFN- $\gamma$ ) and/or 5  $\mu\text{M}$  SB203580 (p38 $\alpha/\beta$

494 MAPK inhibitor) were added. Media were changed every 3 d. Every 6-8 d, cells were passaged by lifting  
495 from the gels using 0.25% Trypsin/0.1% EDTA, quenched with GM, and counted with a hemocytometer.  
496 After counting, cells were pooled in equal numbers from  $n = 1-4$  wells per condition and were reseeded  
497 at 500-1000 cells  $\text{cm}^{-2}$  on new laminin-conjugated hydrogels and in fresh medium. In some experiments,  
498 wells were fixed or lysed for other analyses. Long-term cultures were maintained by weekly passages  
499 until 28-42 d. For experiments on plastic substrate in **Fig. S5**, 24-well tissue-culture plastic plates were  
500 coated with 50  $\mu\text{L}$  dialyzed laminin ( $0.125 \mu\text{g} \mu\text{L}^{-1}$  in  $1\times$  PBS), incubated at  $37^\circ\text{C}$ , and rinsed three times  
501 with  $1\times$  PBS prior to seeding.

502

503 **Modulation contrast microscopy.** Cells were washed  $3\times$  with cold  $1\times$  PBS, then incubated with cold  
504 4% paraformaldehyde in PBS for 12 min. Cells were washed  $3\times$  with cold  $1\times$  PBS, then left in  $1\times$  PBS  
505 for imaging. Modulation contrast images were acquired using a modified Nikon Eclipse Ti-E microscope  
506 (Micro-Video Instruments, Inc.) with custom green LED light source, a Nikon LWD NAMC 20 $\times$  objective  
507 (# MRP66205), and an Andor Zyla 5.5 sCMOS Camera. Digital images were captured with 50 ms  
508 exposure.

509

510 **Quantitative immunoblotting.** Primary myoblasts (PMBs) were isolated from C57BL/6J mice as  
511 described previously (Rando and Blau, 1994). PMBs were seeded on 12 kPa PEG hydrogels in GM with  
512 FGF2, cultured for 12-18 h, then switched to DMEM without serum for 6 h, and stimulated with or without  
513 the cytokine mix for 30 min. Cells were washed with cold  $1\times$  PBS and lysed for immunoblotting using an  
514 NP-40-based lysis buffer containing 50 mM b-glycerophosphate, 30 mM NaF, 10 mM NaPP, 50 mM Tris-  
515 HCl, 0.5% NP-40 substitute, 150 mM NaCl, 1 mM benzamidine, 2 mM EGTA, 400  $\mu\text{M}$  sodium  
516 orthovanadate, 200  $\mu\text{M}$  DTT, 2 mM PMSF, 1:200 dilution Phosphatase Inhibitor Cocktail Set III (EMD  
517 Millipore # 524627). Lysate were collected and centrifuged at  $4^\circ\text{C}$  for 10 min at  $15,000\times g$ . The lysate  
518 supernatants were collected, and protein concentration was quantified using a Micro BCA Protein Assay  
519 Kit (Thermo Fisher Scientific # 23235) per manufacturer's protocol. Electrophoresis gels (1.5 mm  
520 thickness, 10% acryl/bisacrylamide, Tris-HCl, ammonium persulfate, tetramethylethylenediamine,  
521 sodium dodecyl sulfate (SDS)) were loaded with 25  $\mu\text{g}$  of sample in 25  $\mu\text{L}$  of  $1\times$  sample buffer (20 mM  
522 Tris-HCl, Glycine, 10% SDS, 0.4%  $\beta$ -mercaptoethanol) per lane or 1  $\mu\text{L}$  of strep-tagged unstained protein  
523 standards (Bio-Rad # 1610363) and run at 100 V for 2 h in Tris-HCl-Glycine-SDS running buffer. Proteins  
524 were transferred to a methanol-activated PVDF membrane overnight at  $4^\circ\text{C}$ , 15 V in Tris-  
525 HCl/Glycine/Methanol transfer buffer. Membranes were blocked in 5% powdered milk in Tris-buffered  
526 saline with Tween-20 (TBST) with gentle rocking at room temperature for 1 hr. Primary antibodies (anti-  
527 phospho-STAT1, anti-phospho-STAT3, anti-phospho-STAT6, anti-phospho-NF $\kappa$ B, anti-GAPDH, or anti-

528 HSP90; see table for details) were diluted in 5% powdered milk in TBST and blots were incubated with  
 529 diluted antibodies with gentle rocking at room temperature for 1 hr. Blots were then washed three times  
 530 with 1× TBST for 5 min per wash. Peroxidase-conjugated goat anti-rabbit (Jackson ImmunoResearch #  
 531 111-035-144) and/or peroxidase-conjugated goat anti-mouse (Jackson ImmunoResearch # 115-035-146)  
 532 secondary antibodies were diluted 1:200 in 1× TBST and incubated with blots under gentle rocking at  
 533 room temperature for 30 min. Blots were then washed three times with 1× TBST for 5 min per wash. Blots  
 534 were incubated in ECL reagents (1:1 mix of luminol/HRP substrate solutions; Bio-Rad # 1705062) for 1  
 535 min and then imaged for 120 s using the ChemiDoc imaging system (Bio-Rad # 17001401). Blots were  
 536 analyzed using ImageLab software (BioRad) to calculate individual band intensities.

| Target          | MW (kDa) | Type              | Dilution | Vendor                    | Catalog # |
|-----------------|----------|-------------------|----------|---------------------------|-----------|
| p-STAT1 (pY701) | 85       | Monoclonal rabbit | 1:1000   | Cell Signaling Technology | 9167S     |
| p-STAT3 (pY705) | 80       | Monoclonal rabbit | 1:1000   | Cell Signaling Technology | 9145S     |
| p-STAT6 (pY641) | 110      | Monoclonal rabbit | 1:1000   | Cell Signaling Technology | 56554S    |
| p-NFκB (pS536)  | 65       | Monoclonal rabbit | 1:1000   | Cell Signaling Technology | 3033S     |
| GAPDH           | 37       | Monoclonal mouse  | 1:2500   | Thermo Fisher Scientific  | AM4300    |
| HSP90           | 90       | Polyclonal rabbit | 1:2500   | Santa Cruz Biotechnology  | sc-7947   |

537

538 **Quantitative RT-PCR.** We isolated RNA from cell pellets using the E.Z.N.A. MicroElute Total RNA Kit  
 539 (Omega Bio-tek # R6831-01) into 30 μL of protease-free water. cDNA was obtained via reverse  
 540 transcription using the High Capacity cDNA RT Kit (Thermo Fisher Scientific # 4368814) and prepared  
 541 for RT-PCR using the SYBR Green PCR MasterMix (Thermo Fisher Scientific # 4309155). PCR was  
 542 performed in a Viia 7 Real-Time PCR System (Thermo Fisher Scientific) using the following settings:  
 543 cycling at 95°C for 10 min followed by 40 cycles of 95°C for 15 sec and 60 °C for 1 min. We quantified  
 544 transcript levels using the  $2^{-\Delta\Delta CT}$  method to compare gene expression levels between treatment  
 545 conditions and appropriate controls. Primer sequences were used for *Pax7*, *Myf5*, *Myod1*, *Myog*, and  
 546 *36B4* are reported in the table below).

| Gene         | Forward Primer (5' to 3') | Reverse Primer (5' to 3') |
|--------------|---------------------------|---------------------------|
| <i>Pax7</i>  | CTGGATGAGGGCTCAGATGT      | GGTTAGCTCCTGCCTGCTTA      |
| <i>Myf5</i>  | TGAAGGATGGACATGACGGACG    | TTGTGTGCTCCGAAGGCTGCTA    |
| <i>Myod1</i> | GCCGCCTGAGCAAAGTGAATG     | CAGCGGTCCAGGTGCGTAGAAG    |
| <i>Myog</i>  | TGTTTGTAAGCTGCCGTCTGA     | CCTGCCTGTTCCCGGTATC       |
| <i>36B4</i>  | AACGGCAGCATTATAACCC       | CGATCTGCAGACACACTG        |

547

548 **Luminex phosphoprotein immunoassays.** MuSCs were cultured on 12 kPa laminin-coated hydrogels  
 549 as described above. As part of the long-term MuSC culture passaging protocol, cells were lysed (n = 3-  
 550 4 replicates per condition) on days 2, 7, 13, 19, 25, and 32. Cells were washed with cold 1× PBS and

551 lysed using the Bio-Plex Pro Cell Signaling Reagent Kit lysis buffer (Bio Rad # 171304006M)  
552 supplemented with 2 mM PMSF and 1:200 dilution Phosphatase Inhibitor Cocktail Set III (EMD Millipore  
553 # 524627). Lysates were collected and centrifuged at 4°C for 10 min at 15,000×g. Supernatants were  
554 collected and protein concentrations were quantified using a Micro BCA Protein Assay Kit per  
555 manufacturer's protocol. Bio-Plex Pro Magnetic Cell Signaling assays (Bio Rad) were used to quantify  
556 the following phosphoproteins: phospho-AKT (Ser473; # 171V50001M), phospho-ERK1/2  
557 (Thr202/Tyr204, Thr185/Tyr187; # 171V50006M), phospho-cJun (Ser463; 171V50003M), phospho-  
558 STAT3 (Tyr705; # 171V50022M), phospho-IκBα (Ser32/Ser36; # 171V50010M), phospho-p38α/β MAPK  
559 (Thr180/Tyr182; # 171V50014M), and phospho-HSP27 (Ser78; # 171V50029M). Assays were performed  
560 in multiplex using the Bio-Plex Pro Cell Signaling Reagent Kit per the manufacturer's protocol with 5 μg  
561 of sample per assay, n = 1 technical replicate and n = 3-4 biological replicates per time point. Background-  
562 subtracted fluorescence values for each phosphoprotein were normalized to the background-subtracted  
563 fluorescence values for Bio-Plex Pro Magnetic Signaling Assay Total β-Actin (Bio Rad # 171V60020M).  
564 Normalized values were averaged across biological replicates and then scaled from 0 to 1, with 0  
565 corresponding with the lowest and 1 corresponding with the highest value across time points for a given  
566 phosphoprotein.

567

568 **Imaging Pax7-zsGreen transgene expression.** MuSCs isolated by FACS from Pax7-zsGreen  
569 transgenic mice by FACS using (propidium iodide/CD45/CD11b/CD31/Sca1)<sup>-</sup> CD34<sup>+</sup> α7-integrin<sup>+</sup> cell  
570 sorting gate (typically with >95% zsGreen positivity; data not shown) and were maintain in long-term  
571 cultures as described above. Modulation contrast and epifluorescence images were acquired using a  
572 modified Nikon Eclipse Ti-E microscope (Micro-Video Instruments, Inc.) with a custom green LED light  
573 source, a 470-nm excitation source from a SPECTRA-X light engine (Lumencor), a Nikon LWD NAMC  
574 20× objective (# MRP66205), a DAPI/FITC/Cy3/Cy5 polychroic (Chroma # VCGR-SPX-P01), and an  
575 Andor Zyla 5.5 sCMOS Camera. Modulation contrast and fluorescence images were captured with 50 ms  
576 and 1 s exposures, respectively. Cell Profiler (ver. 3.0.0, Broad Institute) was used to segment and  
577 threshold images. Median intensity of zsGreen signal for each segmented cell was calculated and then  
578 background subtracted to normalize intensity across each day/condition. For each culture day, a  
579 consistent threshold was applied to background-subtracted median intensities to assign a positive or  
580 negative Pax7-zsGreen expression state to each cell.

581

582 **MuSC transplantation engraftment assays.** Cell transplantation assays were performed to assess the  
583 engraftment potential of cultured MuSCs, following previous reports (Cosgrove et al., 2014; Gilbert et al.,  
584 2010; Quarta et al., 2016; Sacco et al., 2008). MuSCs were isolated from transgenic Luciferase mice,

585 with Luciferase expression regulated by the ubiquitous CAG promoter. After specific culture durations,  
586 cells were collected, counted, and resuspended into FACS buffer solution. Transplants were performed  
587 with 500 cells per 10  $\mu$ L into the tibialis anterior muscles of anesthetized recipient NSG mice by  
588 intramuscular injection. Bioluminescent imaging (BLI) was performed at 1 mo post-transplant to assess  
589 transplanted cell survival and engraftment. Recipient mice were anesthetized with isoflurane,  
590 administered 0.1 mmol kg<sup>-1</sup> D-luciferin reconstituted in 150  $\mu$ L sterile 1 $\times$  PBS by intraperitoneal injection,  
591 and imaged on an IVIS Spectrum In Vivo Imaging System (Perkin Elmer) 12 min later. BLI images were  
592 analyzed using Living Image (Perkin Elmer) software with a fixed region-of-interest (ROI) size to quantify  
593 the bioluminescent signal from each hindlimb. BLI thresholds indicated for stable cell engraftment were  
594 set (in **Figs. 6C** and **S5B**) in agreement with previous reports (Cosgrove et al., 2014; Sleep et al., 2017).

595

596 **Statistical analysis.** All cell culture experiments were performed with n = 3-4 replicates unless otherwise  
597 noted. Transplant engraftment assays were performed using n = 3-10 replicates and BLI levels were  
598 analyzed using a Mann-Whitney U test. An unpaired two-tailed (Student's) T test was used for all other  
599 data. Notably, cumulative cell yield and relative gene expression values were both log-transformed prior  
600 to statistical testing. A significance level  $\alpha = 0.05$  was used for all statistical tests. In figures, \* denotes a  
601 p-value  $< \alpha$  and *n.s.* (not significant) denotes a p-value  $\geq \alpha$ .

602 **Acknowledgments**

603 This work was financially supported by the National Institutes of Health under awards R00AG042491,  
604 R01AG058630, R21EB024747, and R21AR072265 (to B.D.C), the National Science Foundation under  
605 award DMR-1006323 (to L.A.A.), a US Department of Education Graduate Assistantship in Areas of  
606 National Need under Award P200A150273 (to A.M.L.), Roberta G. and John B. DeVries Graduate  
607 Fellowships (to A.M.L. and V.M.A.), Hunter R. Rawlings III Cornell Presidential Research Scholarships  
608 (to J.C.C. and R.F.K.), and a Cornell Engineering Learning Initiatives Undergraduate Research Award  
609 (to P.F.). The authors acknowledge technical support from the Cornell Center for Animal Resources and  
610 Education and Cornell University Biotechnology Resource Center (BRC) Flow Cytometry Facility and  
611 Imaging Facility. The IVIS-Spectrum imaging system was supported by NIH award S10OD025049. The  
612 authors acknowledge support on mechanical rheometry instrumentation from the Cornell Energy  
613 Systems Institute (CESI). The authors acknowledge the kind donation of Pax7-zsGreen transgenic mice  
614 from M. Kyba at the University of Minnesota. The authors acknowledge technical assistance from A. De  
615 Micheli, G. Livermore, H. Sit, M. S. Jalal, and R. Asmus. The authors thank A. Earle and J. Lammerding  
616 for assistance in maintaining the mdx mouse colony. The authors thank R. Puri from the Cornell  
617 Progressive Assessment of Therapeutics (PATH) Facility for maintaining the NSG mouse colony.

618

619 **Author contributions**

620 A.M.L., K.H.K., S.Y.S., V.M.A., and B.D.C. designed the study. A.M.L., S.Y.S., V.M.A., P.F., and E.H.H.F.  
621 organized the mouse colony and performed animal procedures and cell isolations. V.M.A. and B.D.C.,  
622 with assistance from R.M. and L.A.A., performed hydrogel characterization studies. A.M.L., K.H.K.,  
623 S.Y.S., and V.M.A. conducted the long-term cell culture studies. K.H.K., V.M.A., and P.F. performed and  
624 analyzed the gene expression studies. A.M.L. and R.F.K. performed and analyzed the immunoblot  
625 assays. K.H.K., A.M.L., and J.C.C. conducted the Pax7-zsGreen imaging studies. K.H.K., S.Y.S., P.F.,  
626 E.H.H.F., and B.D.C. performed the cell transplantation studies. A.M.L., K.H.K., and V.M.A. performed  
627 the statistical analyses. A.M.L., K.H.K., V.M.A., and B.D.C. wrote the manuscript. All authors reviewed  
628 the manuscript.

629

630 **Author contributions using CRediT taxonomy**

631 Conceptualization and Methodology, A.M.L., K.H.K., S.Y.S., V.M.A., B.D.C.;

632 Investigation and Formal Analysis, A.M.L., K.H.K., S.Y.S., V.M.A., J.C.C., R.F.K., P.F., E.H.H.F, R.M.;

633 Writing – Original Draft, A.M.L., K.H.K., V.M.A., B.D.C.;

634 Writing – Review and Editing, A.M.L., B.D.C.;

635 Funding Acquisition and Supervision, B.D.C., L.A.A.

636

637 **Conflicts of interest**

638 The authors declare no conflicts of interest.

639 **Main Figures and Legends**

640

641

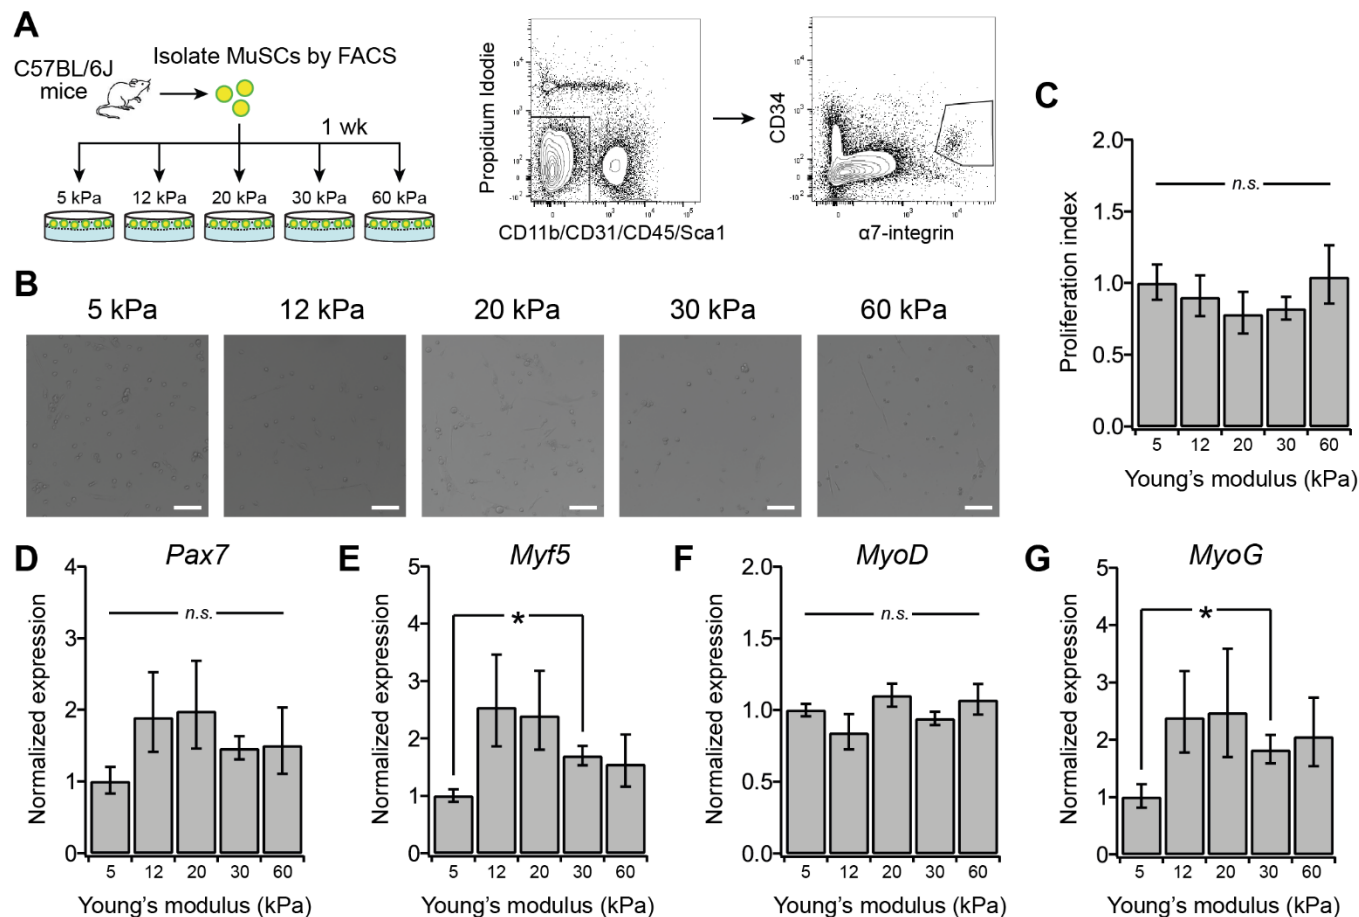

642

643

644 **Figure 1. Muscle mimicking substrate stiffness differences influence negligible effects on MuSC**

645 **phenotype in short-term cultures. (A)** Experimental design. MuSC were isolated via FACS sorting for

646 CD34<sup>+</sup>/α7-integrin<sup>+</sup>, seeded on laminin-conjugated hydrogels ranging from 5-60 kPa Young's modulus,

647 and treated with myogenic growth medium containing FGF2 for 1 wk. See also **Fig. S1** for hydrogel

648 characterization. **(B)** Representative Hoffman modulation contrast images at 1 wk. Scale bar, 100 μm.

649 **(C)** Proliferation index (cell number normalized to 5 kPa condition) after 1 wk. Mean ± s.e.m., n = 4. **(D-**

650 **G)** RT-qPCR measurement of *Pax7*, *Myf5*, *MyoD1*, and *MyoG* expression normalized to *36B4* at 1 wk.

651 Mean ± s.e.m., n = 4. \* denotes  $P < 0.05$  by Student's T-test and n.s. denotes not significant in **(C-G)**.

652



653

654

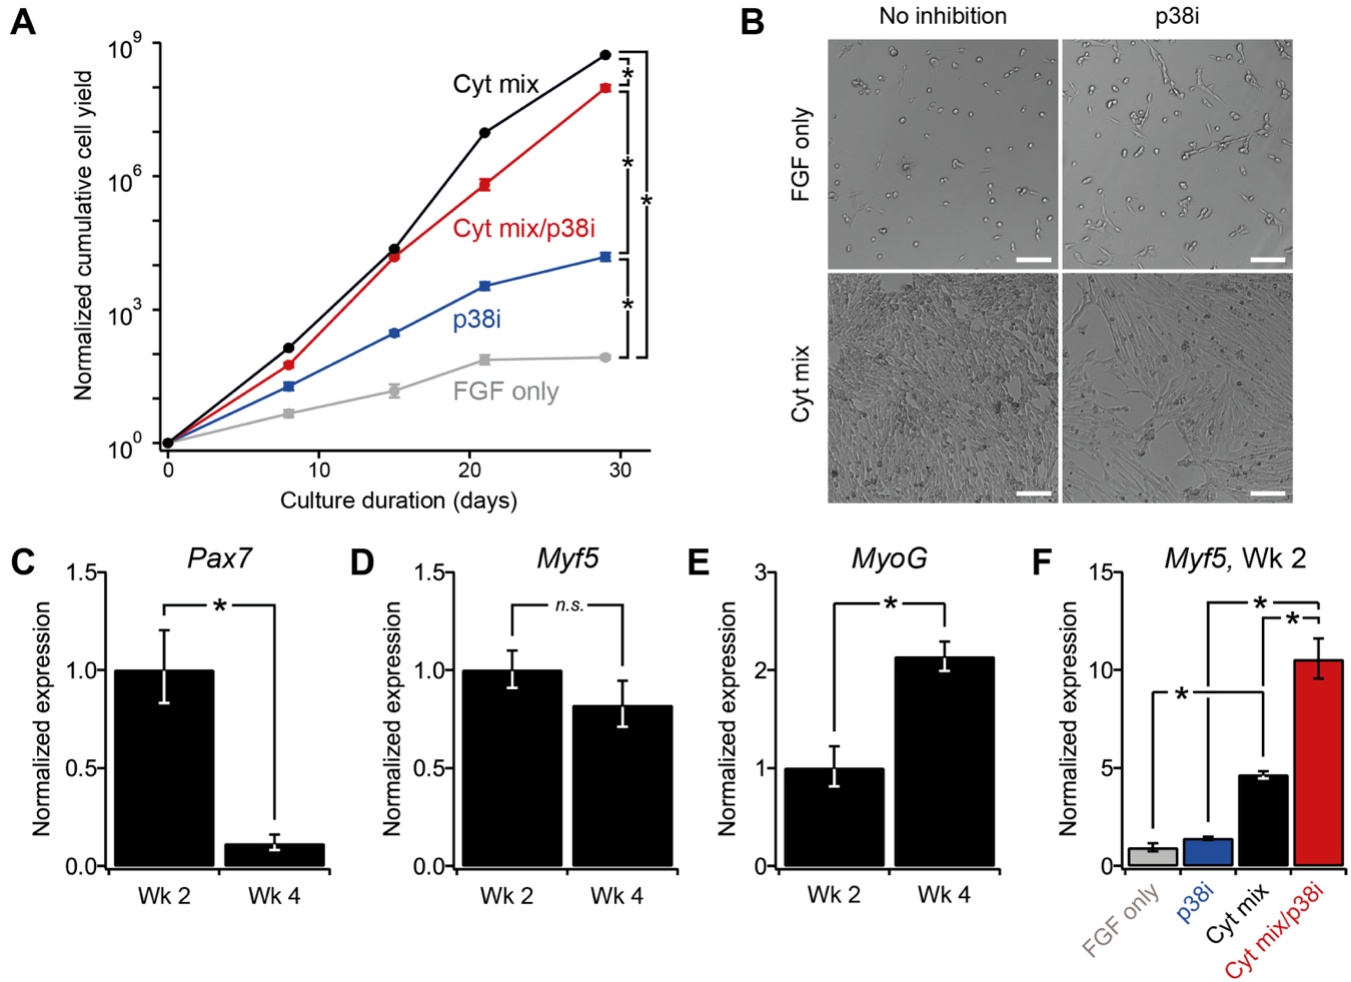

655

656

657

658

659

660

661

662

663

664

665

**Figure 2. Long-term cytokine treatment enhances MuSC proliferative yield while reducing expression of stem cell-related gene. (A-F)** Long-term MuSC cultures on 12-kPa hydrogels passaged every 6-8 d and treated with FGF2 or cytokine mix (FGF2, TNF- $\alpha$ , IL-1 $\alpha$ , IL-13, and IFN- $\gamma$ ) and/or p38i (SB203580, 5  $\mu$ M) for 4 wks. **(A)** Representative modulation contrast images at 2 wks. Scale bar, 100  $\mu$ m. **(B)** Cumulative cell yield counts normalized to seeded number. Mean  $\pm$  s.e.m., n = 4. \* denotes  $P < 0.05$  by Student's T-test for log-transformed values at 4 wks. See also **Fig. S2A-B**. **(C-E)** RT-qPCR measurement of *Pax7*, *Myf5*, and *MyoG* expression normalized to *36B4* in cytokine mix condition at 2 and 4 wks. Mean  $\pm$  s.e.m., n = 3. **(F)** RT-qPCR measurement of *Myf5* expression normalized to *36B4* at 2 wks. Mean  $\pm$  s.e.m., n = 3. \* denotes  $P < 0.05$  by Student's T-test in **(C-F)**.

665

666  
667

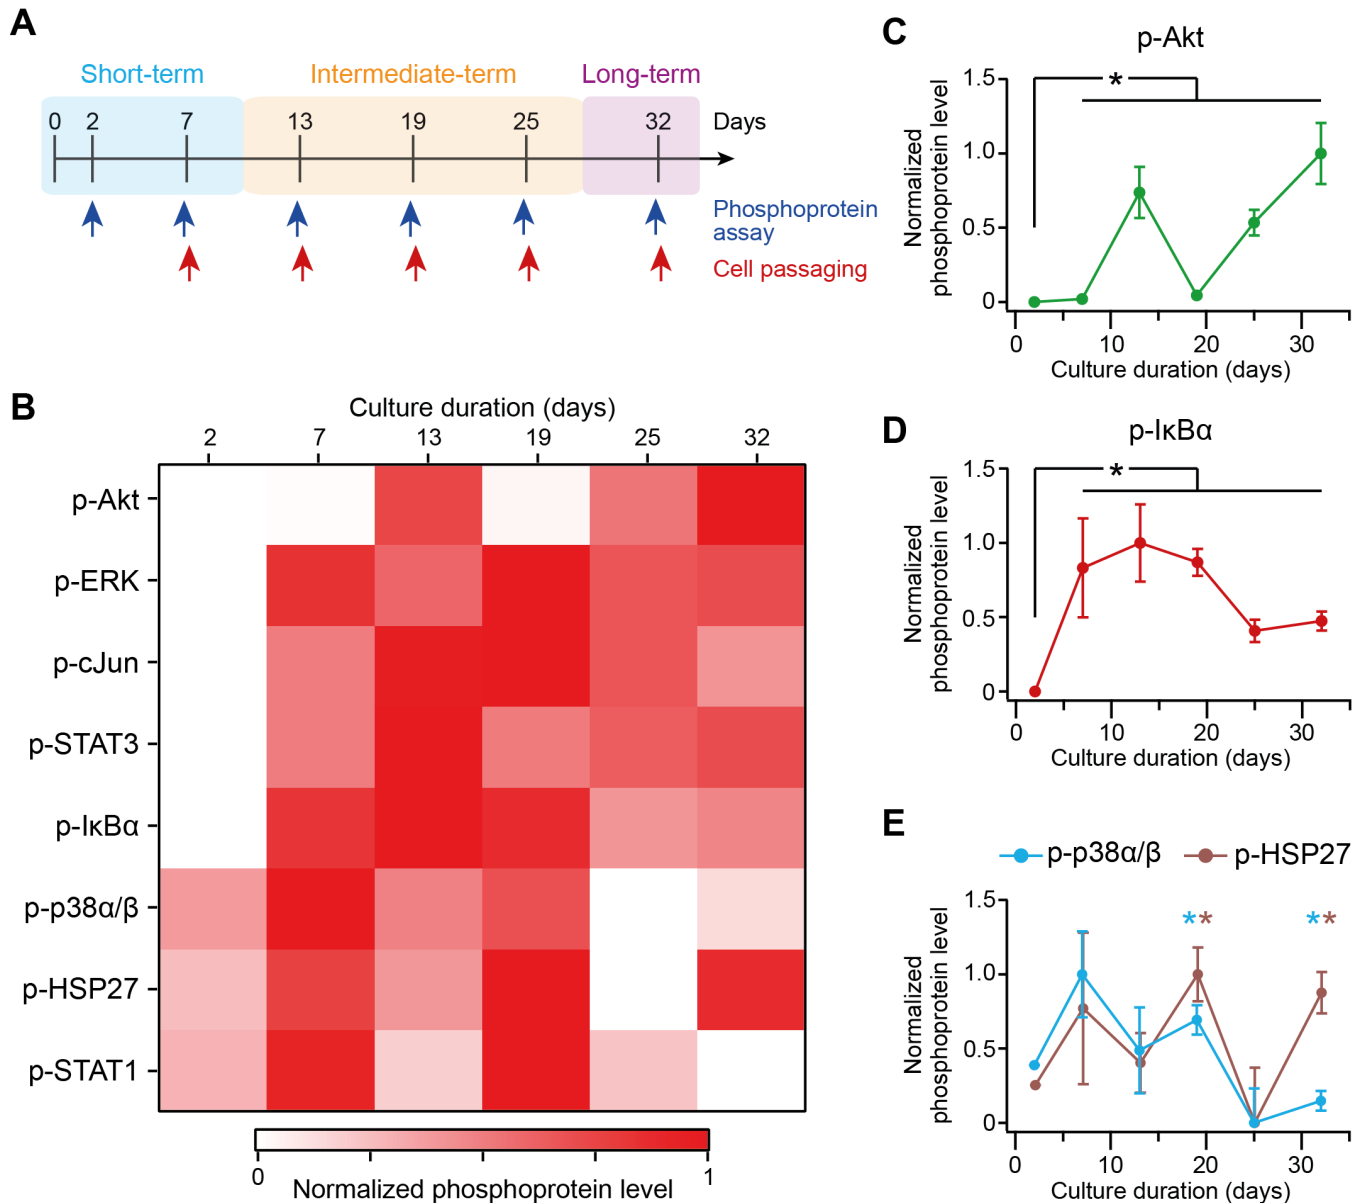

668

669 **Figure 3. Cytokine mix induces staged intracellular signaling activation during long-term MuSC**  
 670 **cultures. (A)** MuSC were cultured on 12-kPa hydrogels treated with FGF2 and cytokine mix (TNF- $\alpha$ , IL-  
 671 1 $\alpha$ , IL-13, IFN- $\gamma$ ), passaged every 6-8 d, and 8 phosphoproteins were measured using Luminex assays  
 672 and normalized to  $\beta$ -actin. **(B-E)** Normalized phosphoprotein levels at 2-32 d, with each scaled from 0 to  
 673 1 over its range. **(B)** Heatmap of mean values,  $n = 3$ . **(C-E)** Time-courses for p-AKT, p-IkB $\alpha$ , phospho-  
 674 p38 $\alpha/\beta$  MAPK, and p-HSP27. Mean  $\pm$  s.e.m.,  $n = 3$ . \* denotes  $P < 0.05$  by Student's T-test compared to  
 675 d 2. See also **Fig. S3**.

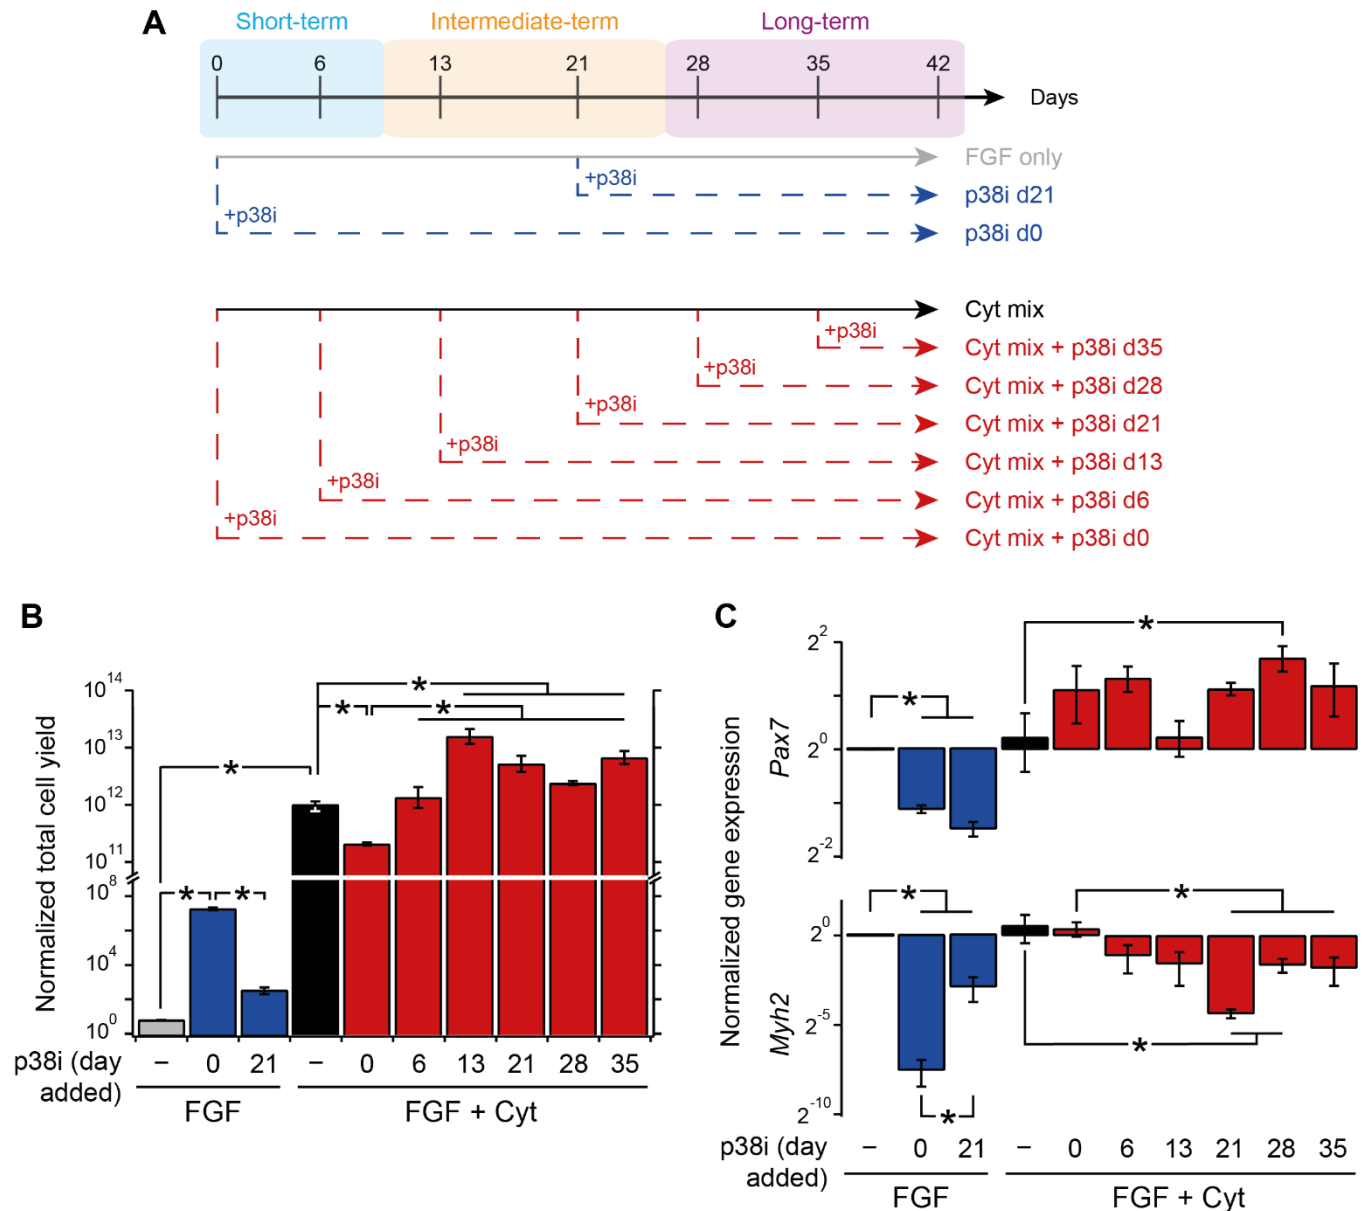

676

677

678 **Figure 4. Late-stage inhibition of p38 $\alpha/\beta$  enhances cell yield and stem cell phenotype in long-term**  
 679 **MuSC cultures.** (A-C) Long-term MuSC cultures on 12-kPa laminin-conjugated hydrogels were  
 680 passaged every 6-8 d and treated with FGF or FGF + cytokine mix (TNF- $\alpha$ , IL-1 $\alpha$ , IL-13, IFN- $\gamma$ ), without  
 681 or with p38i (SB203580, 5  $\mu$ M; addition staged weekly). (A) Schematic of staged p38 $\alpha/\beta$  inhibition  
 682 scheme. “p38i dX” indicates SB203580 was added starting at d X and maintained thereafter. (B)  
 683 Normalized cumulative cell yield at 42 d. Mean  $\pm$  s.e.m., n = 4. See also **Fig. S4** for yield timecourse. (C)  
 684 RT-qPCR assay of *Pax7* and *Myh2* expression normalized to *36B4* at 42 d. Mean  $\pm$  s.e.m., n = 4. \*  
 685 denotes  $P < 0.05$  by Student’s T-test on log-transformed values in (B-C).

686

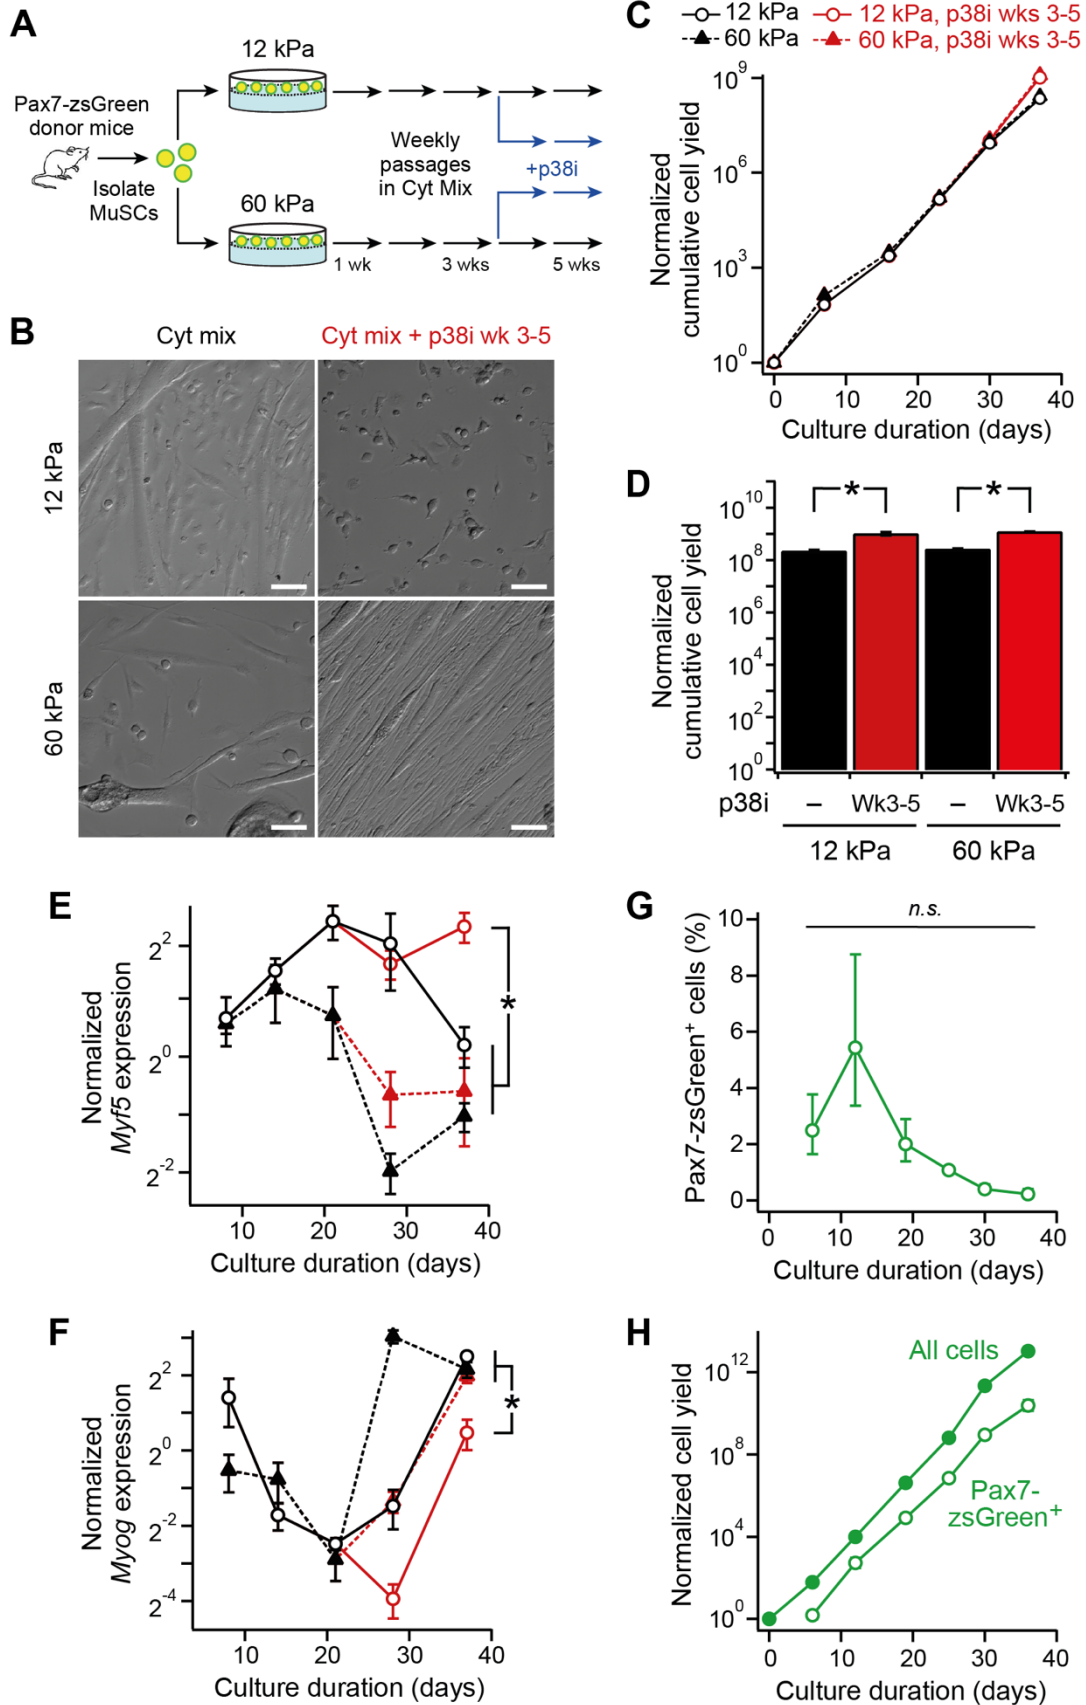

688 **Figure 5** (previous page). **Late-stage p38 $\alpha$ / $\beta$  inhibition enhancement of MuSC phenotypes are**  
689 **contingent on soft hydrogel substrates. (A-H)** MuSC isolated from *Pax7-zsGreen* transgenic mice  
690 were cultured 12 or 60 kPa laminin-conjugated hydrogels were passaged every 7 d and treated with FGF  
691 and cytokine mix (TNF- $\alpha$ , IL-1 $\alpha$ , IL-13, IFN- $\gamma$ ), with or without p38i (SB203580, 5  $\mu$ M) from 3 to 5 wks.  
692 **(A)** Experimental scheme. **(B)** Representative modulation contrast images. Scale bar, 100  $\mu$ m. **(C)**  
693 Normalized cumulative cell yield from 0-5 wks. Mean  $\pm$  s.e.m., n = 3. **(D)** Normalized total cell yield at 5  
694 wks. Mean  $\pm$  s.e.m., n = 3. **(E-F)** RT-qPCR measurement of *Myf5* and *Myog* expression normalized to  
695 *36B4* at 1-5 wks. Mean  $\pm$  s.e.m., n = 4. **(G)** Normalized cumulative and Pax7-zsGreen<sup>+</sup> cell yield for  
696 cytokine mix with p38i for 3-5 wks on 12 kPa hydrogels. Mean  $\pm$  s.e.m., n = 3. **(H)** Pax7-zsGreen<sup>+</sup> cells  
697 percentage for cytokine mix with p38i for 3-5 wks on 12 kPa hydrogels. Mean  $\pm$  s.e.m., n = 3. \* denotes  
698 *P* < 0.05 by Student's t-test or not significant (n.s.) on log-transformed values in **(C-F)** and on non-  
699 transformed values in **(G)**.

700

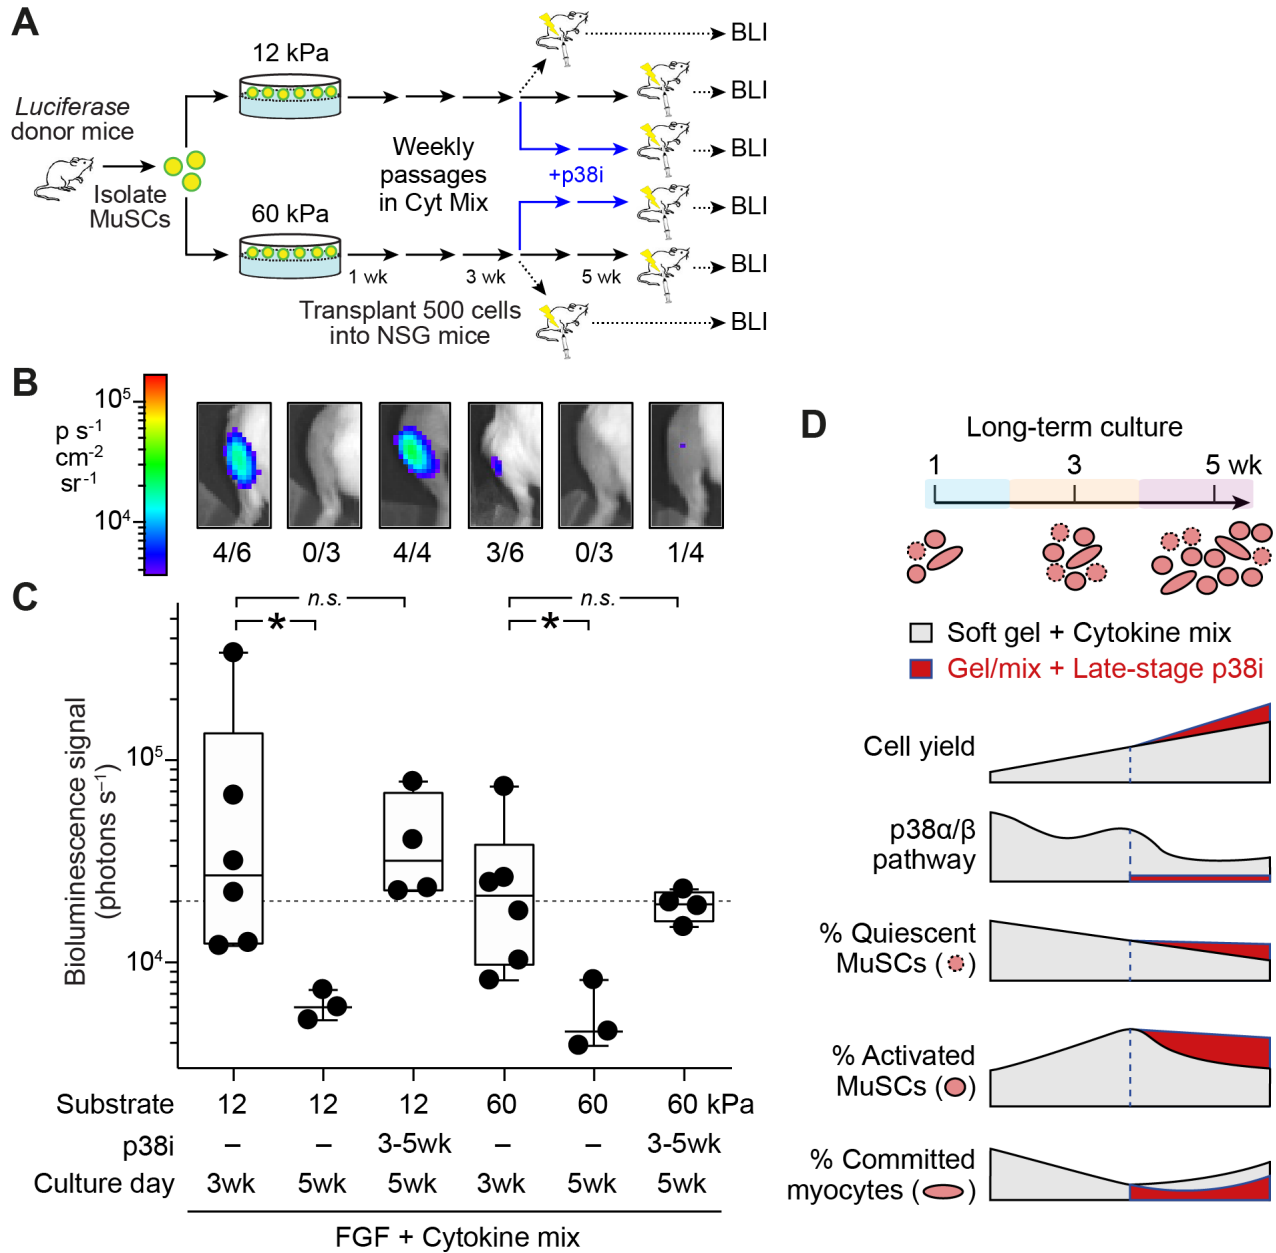

701

702 **Figure 6. Late-stage inhibition of p38α/β MAPK signaling enhances MuSC engraftment in *in vivo***

703 **transplantation.** Luciferase-expressing MuSCs were cultured on 12 or 60 kPa laminin-coated hydrogels

704 in the presence of cytokine mix (TNF-α, IL-1α, IL-13, IFN-γ) with or without the addition of p38i starting

705 from 3-5 wks. At 3 wk or 5 wk, 500 cells were transplanted into NSG mice and engraftment was measured

706 using bioluminescent imaging (BLI) 1-month post-transplantation. (A) Transplant assay schematic. (B-

707 C) Background-subtracted representative BLI images (B) and signals (C) at one-month post-

708 transplantation. Dashed line indicates positive engraftment threshold of 20,000 photons s<sup>-1</sup>. \* denotes *P*

709 < 0.05 or not significant (n.s.) by Mann-Whitney U test. Fraction of transplants resulting in positive

710 engraftment outcome reported in inset of (B). See also Fig. S5. (D) Summary schematic.

711 **Supplementary Figures and Legends**

712

713

714

715

716

717

718

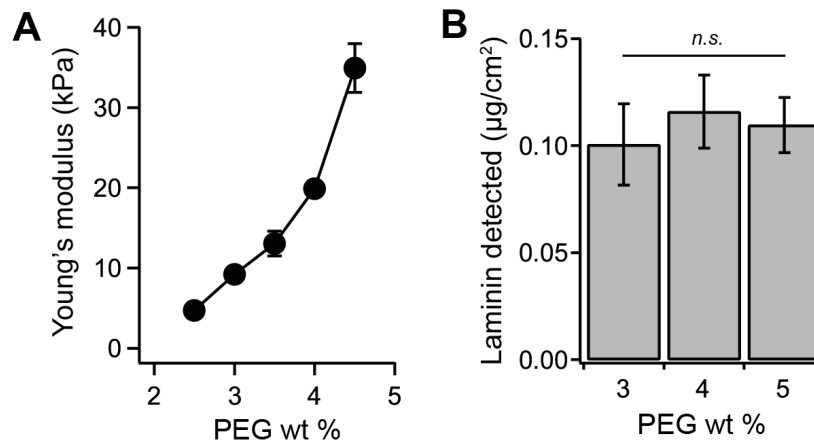

719

720

721 **Figure S1. Biophysical and biomolecular characterization of laminin-conjugated PEG hydrogels**

722 **with varying PEG weight percentage (Related to Figure 1).** (A) Bulk Young's modulus of PEG

723 hydrogels, quantified by shear rheometry, synthesized with 2.5-4.5 weight percentage (wt%) total PEG.

724 Mean  $\pm$  s.e.m.,  $n = 3$ . (B) Laminin concentration detected on PEG hydrogels via immunodetection and

725 secondary chemiluminescence. Mean  $\pm$  s.e.m.,  $n = 3$ . \* denotes  $P < 0.05$  or not significant (n.s.) by

726 Student's T-test in (B).

727

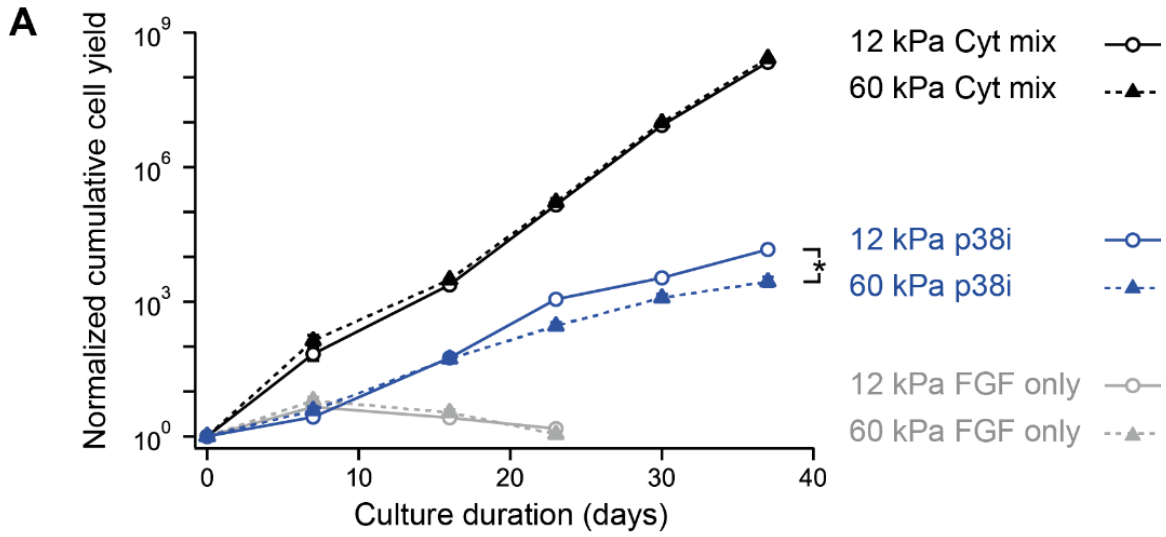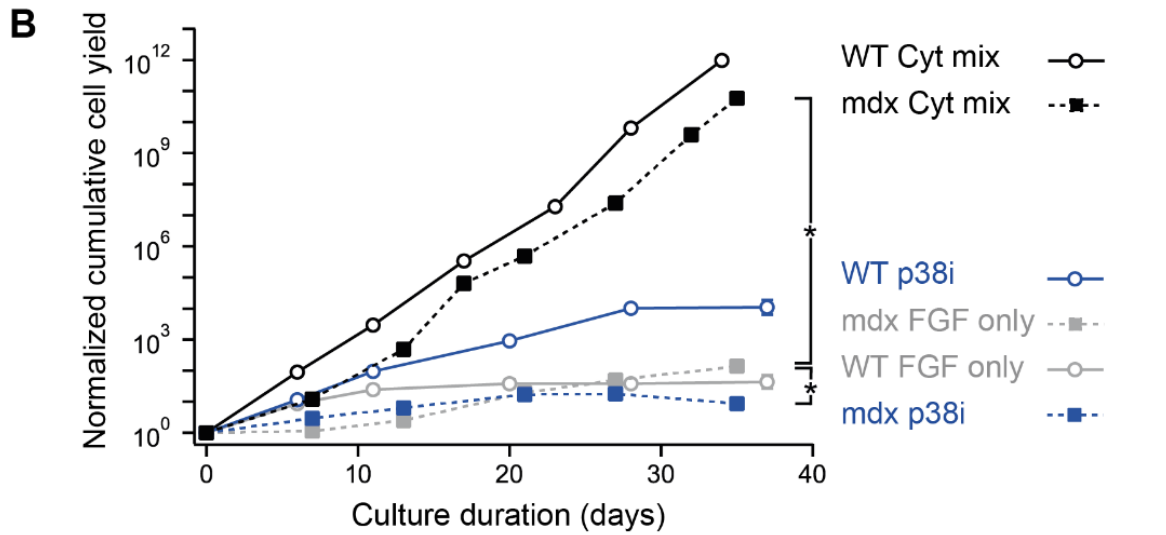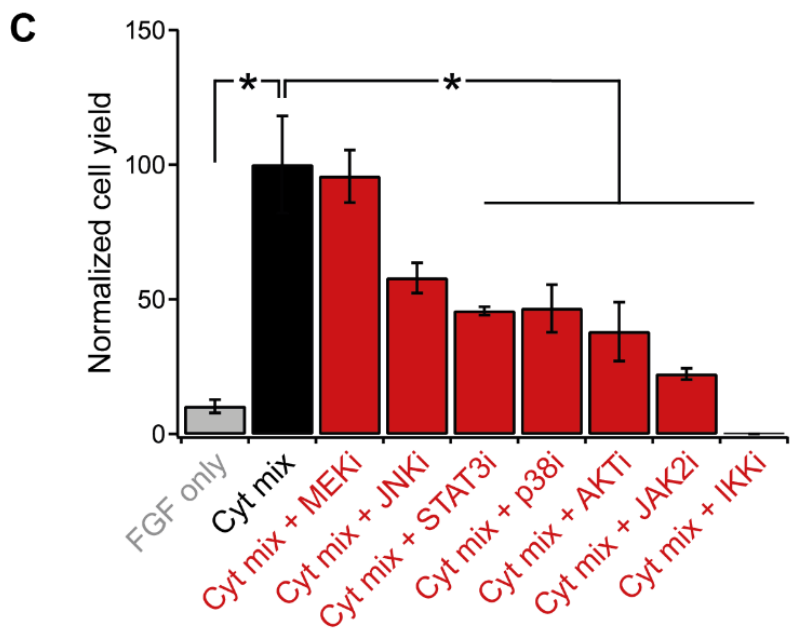



729 **Figure S2** (previous page). **Short-term and long-term MuSC proliferation in response to cytokine**  
730 **mix treatment (Related to Figure 2).** **(A-B)** Long-term MuSC cultures on hydrogels passaged every 6-  
731 8 d and treated with FGF or FGF + cytokine mix (TNF- $\alpha$ , IL-1 $\alpha$ , IL-13, and IFN- $\gamma$ ) or p38i (SB203580, 5  
732  $\mu$ M) for 5 wk. All cell counts normalized to each seeded cell at d 0. **(A)** Normalized cumulative cell yield  
733 counts from 0-40 d for C57BL/6J WT MuSCs treated with (i) FGF only, (ii) FGF + cytokine mix, and (iii)  
734 FGF + p38i on 12 kPa or 60 kPa hydrogels. Mean  $\pm$  s.e.m., n = 4. **(B)** Normalized cumulative cell yield  
735 counts from 0-40 d for C57BL/6J WT vs Dmd<sup>mdx</sup> (mdx) MuSCs treated with (i) FGF only, (ii) FGF +  
736 cytokine mix, and (iii) FGF + p38i on 12 kPa hydrogels. Mean  $\pm$  s.e.m., n = 4. **(C)** Short-term cultures of  
737 WT MuSC on 12 kPa hydrogels and treated with FGF2 or cytokine mix, with or without a small molecule  
738 inhibitor (MEKi: PD0325901, 10 nM; JNKi: SP600125, 1  $\mu$ M; STAT3i: 5,15-DPP, 5  $\mu$ M; p38i: SB203580,  
739 5  $\mu$ M; AKTi: GSK2110183, 10 nM; JAK2i: AG-490, 1  $\mu$ M; IKKi: BMS-345541, 10  $\mu$ M). Normalized cell  
740 yield at 1 wk. Mean  $\pm$  s.e.m., n = 3. \* denotes  $P < 0.05$  by Student's T-test for log-transformed values at  
741 the 5-wk timepoint in **(A-B)** and for non-transformed values in **(C)**.  
742  
743

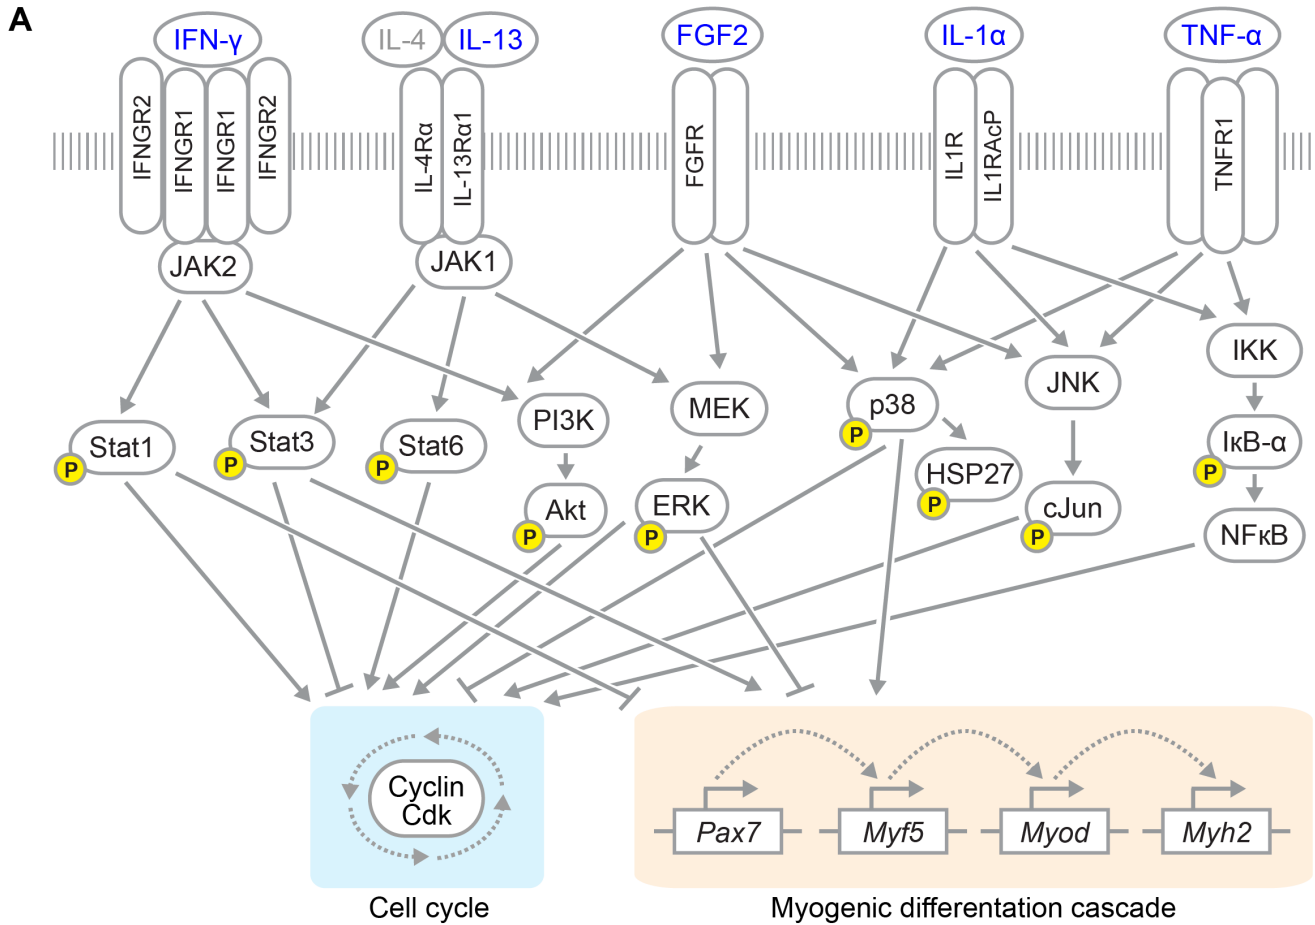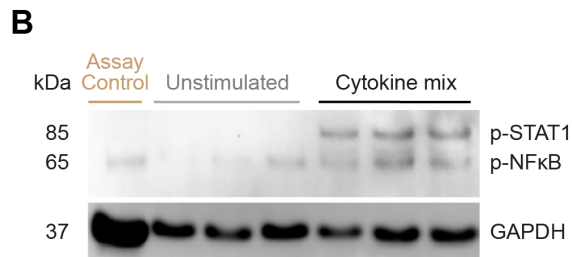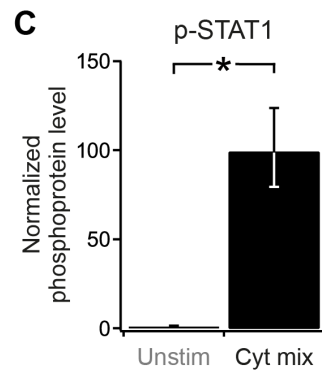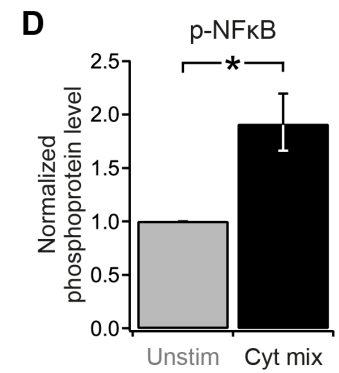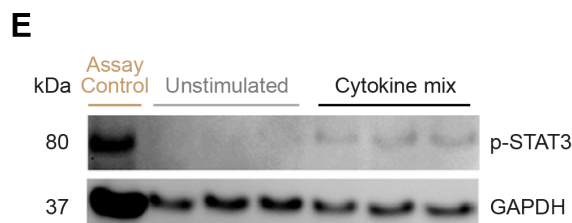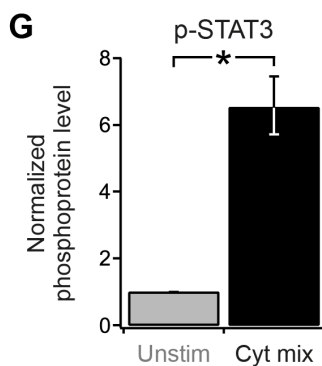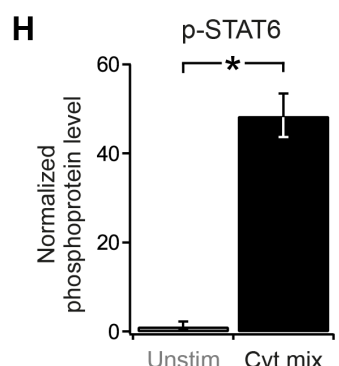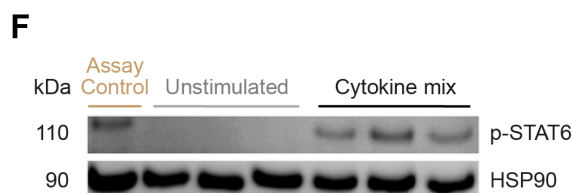

745 **Figure S3** (previous page). **Cytokine treatment induces intracellular signaling activation (Related**  
746 **to Figure 3).** (A) Pathway diagram displaying known activating and inhibiting effects of FGF2 and the  
747 TNF- $\alpha$ , IL-1 $\alpha$ , IL-13, and IFN- $\gamma$  cytokine mix factors on numerous intracellular signaling cascades, cell  
748 cycle genes, and myogenic regulatory genes. Yellow “p” indicates phosphoprotein mediator measured  
749 by Luminex in **Fig. 3.** (B-H) Primary myoblasts were cultured on 12 kPa hydrogels in growth medium and  
750 then switched to basal medium and were stimulated with the cytokine mix for 30 min (or left unstimulated)  
751 and then were lysed and analyzed by immunoblotting. (B, E, F) Immunoblots for STAT1 (pY701), NF $\kappa$ B  
752 (pS536), STAT3 (pY705), STAT6 (pY641), GAPDH, and/or HSP90. (C, D, G, H) Phosphoprotein band  
753 abundance normalized to GAPDH or HSP90 as a housekeeping protein, and then averaged across  
754 biological replicates from (B, E, F). Mean  $\pm$  s.e.m., n = 3. \* denotes  $P < 0.05$  by Student’s T-test.  
755  
756

757  
758  
759  
760

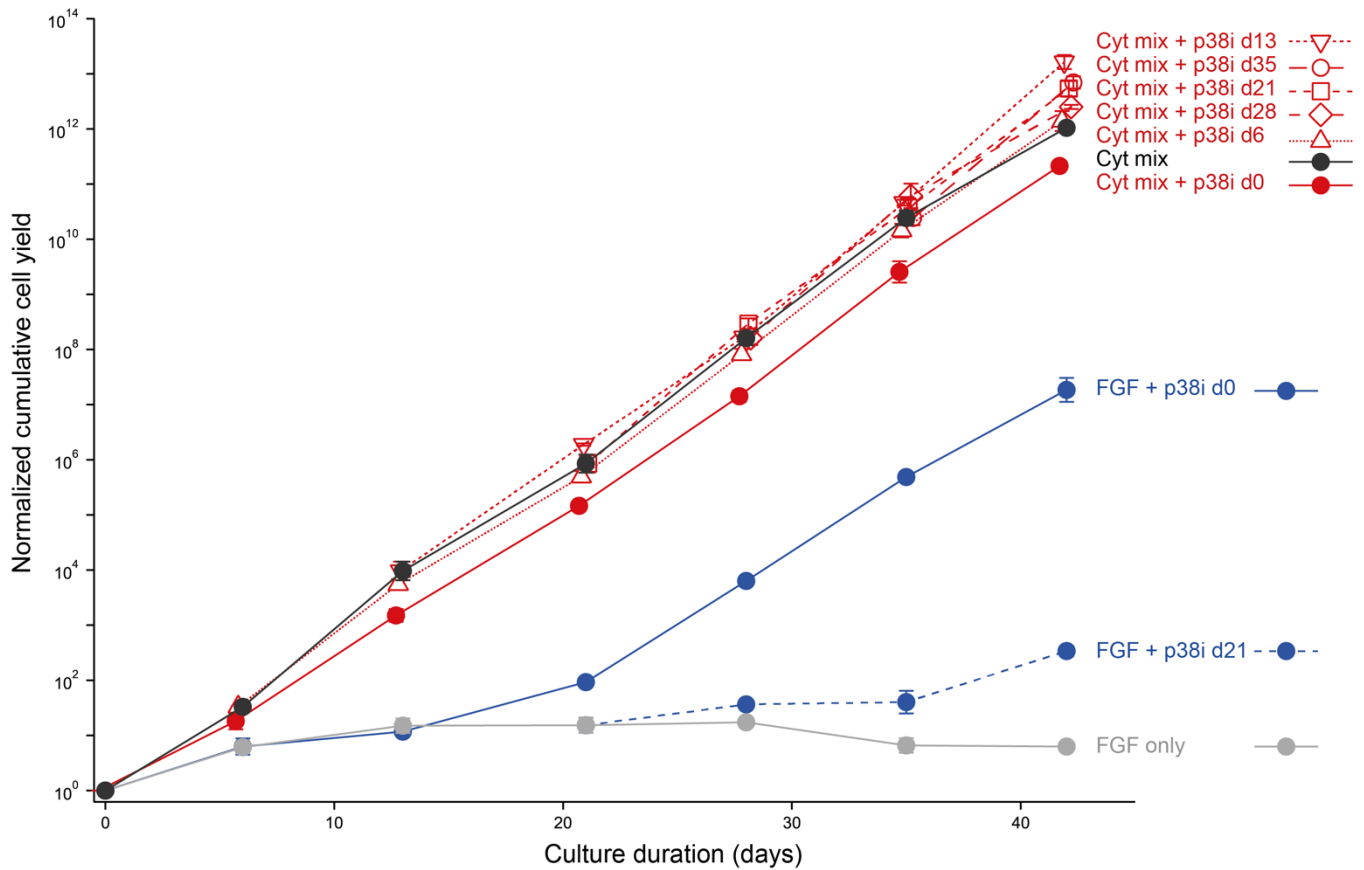

761  
762  
763  
764  
765  
766  
767  
768  
769

**Figure S4. Late-stage inhibition of p38 $\alpha/\beta$  MAPK enhances MuSC expansion in long-term cultures (Related to Figure 4).** Long-term MuSC cultures on 12 kPa laminin-conjugated hydrogels were passaged every 6-8 d and treated with FGF or FGF + cytokine mix (TNF- $\alpha$ , IL-1 $\alpha$ , IL-13, IFN- $\gamma$ ), without or with p38i (SB203580, 5  $\mu$ M; addition staged weekly). "p38i dX" indicates SB203580 was added starting at day X and maintained in every media change thereafter. Normalized cumulative cell yields from 0-42 d. Mean  $\pm$  s.e.m., n = 4. Statistical analyses reported for 42 d timepoint in **Fig. 4B**.

770

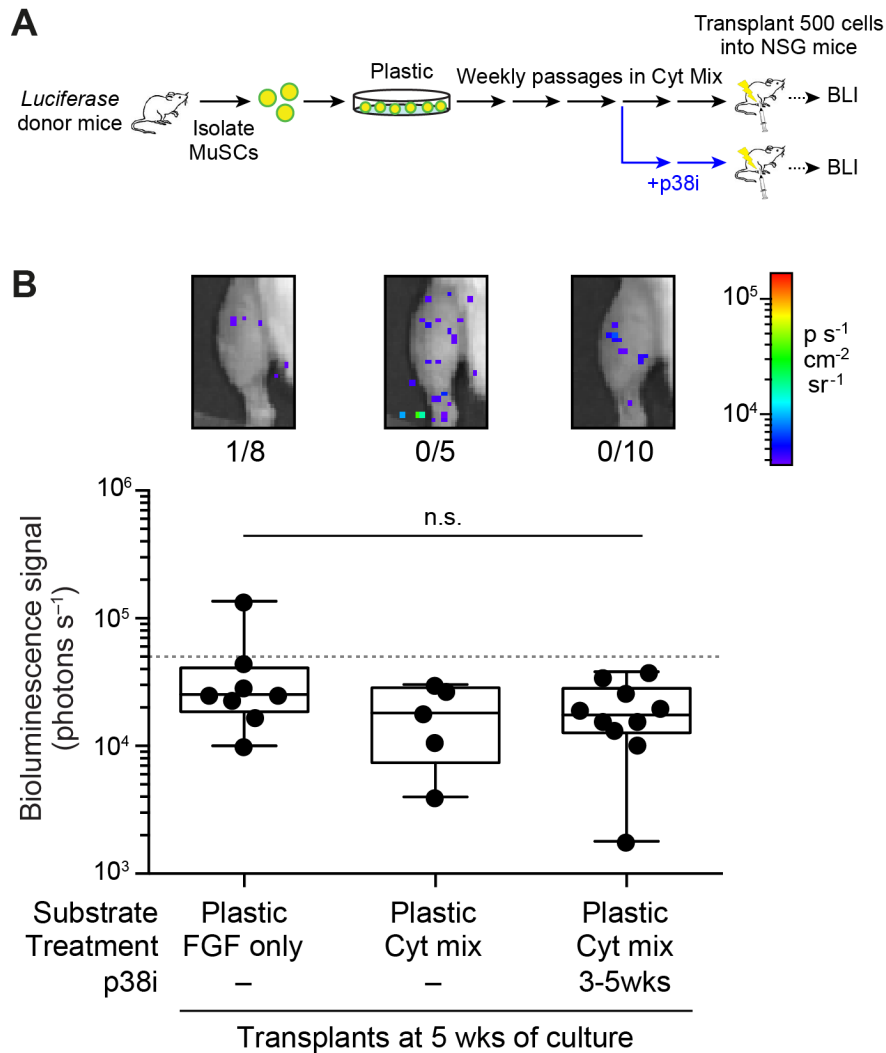

771

772

773 **Figure S5. Plastic substrates are not permissive to enhancement of transplant engraftment**

774 **potential by late-phase p38i treatment in long-term culture (Related to Figure 6).** (A) Transplant

775 assay schematic. Luciferase-expressing MuSCs were cultured and passaged weekly on laminin-

776 conjugated tissue culture plastic substrates in the presence of FGF +/- cytokine mix mix (TNF- $\alpha$ , IL-1 $\alpha$ ,

777 IL-13, IFN- $\gamma$ ), without or with p38i starting at 3 wk. At 5 wk of culture, 500 cells were transplanted into

778 NSG mice and engraftment was measured using bioluminescent imaging (BLI) at one-month post-

779 transplantation. (B) Background-subtracted representative BLI images (top) and signals (bottom; n = 5-

780 10) at one-month post-transplantation for each culture condition are reported. Dashed line indicates

781 positive engraftment threshold of 50,000 photons s<sup>-1</sup>. Fraction of transplants resulting in positive

782 engraftment outcome reported in inset. All comparisons were not significant (n.s.) by Mann-Whitney U

783 test.

784 **References**

785

786 Almada, A.E., and Wagers, A.J. (2016). Molecular circuitry of stem cell fate in skeletal muscle  
787 regeneration, ageing and disease. *Nat. Rev. Mol. Cell Biol.* 17, 267–279.

788

789 Arpke, R.W., Darabi, R., Mader, T.L., Zhang, Y., Toyama, A., Lonetree, C.L., Nash, N., Lowe, D.A.,  
790 Perlingeiro, R.C.R., and Kyba, M. (2013). A new immuno-, dystrophin-deficient model, the NSG-  
791 mdx(4Cv) mouse, provides evidence for functional improvement following allogeneic satellite cell  
792 transplantation. *Stem Cells* 31, 1611–1620.

793

794 Bentzinger, C.F., Wang, Y.X., Dumont, N.A., and Rudnicki, M.A. (2013). Cellular dynamics in the  
795 muscle satellite cell niche. *EMBO Rep.* 14, 1062–1072.

796

797 Bernet, J.D., Doles, J.D., Hall, J.K., Kelly Tanaka, K., Carter, T.A., and Olwin, B.B. (2014). p38 MAPK  
798 signaling underlies a cell-autonomous loss of stem cell self-renewal in skeletal muscle of aged mice.  
799 *Nat. Med.* 20, 265–271.

800

801 Blau, H.M., and Webster, C. (1981). Isolation and characterization of human muscle cells. *Proc. Natl.*  
802 *Acad. Sci. U. S. A.* 78, 5623–5627.

803

804 Blau, H.M., Cosgrove, B.D., and Ho, A.T.V. (2015). The central role of muscle stem cells in  
805 regenerative failure with aging. *Nat. Med.* 21, 854–862.

806

807 Borselli, C., Cezar, C.A., Shvartsman, D., Vandenburgh, H.H., and Mooney, D.J. (2011). The role of  
808 multifunctional delivery scaffold in the ability of cultured myoblasts to promote muscle regeneration.  
809 *Biomaterials* 32, 8905–8914.

810

811 Bosnakovski, D., Xu, Z., Li, W., Thet, S., Cleaver, O., Perlingeiro, R.C., and Kyba, M. (2008).  
812 Prospective isolation of skeletal muscle stem cells with a Pax7 reporter. *Stem Cells* 26, 3194–3204.

813

814 Bouchentouf, M., Skuk, D., and Tremblay, J.P. (2007). Early and massive death of myoblasts  
815 transplanted into skeletal muscle: Responsible factors and potential solutions. *Curr. Opin. Organ*  
816 *Transplant.* 12, 664–667.

817

818 Brien, P., Pugazhendhi, D., Woodhouse, S., Oxley, D., and Pell, J.M. (2013). p38alpha MAPK regulates  
819 adult muscle stem cell fate by restricting progenitor proliferation during postnatal growth and repair.  
820 *Stem Cells* 31, 1597–1610.

821

822 Carraher Jr., C.E. (2016). *Carraher's Polymer Chemistry*.

823

824 Castro, F., Cardoso, A.P., Gonçalves, R.M., Serre, K., and Oliveira, M.J. (2018). Interferon-Gamma at  
825 the Crossroads of Tumor Immune Surveillance or Evasion. *Front. Immunol.* 9, 847.

826

827 Charville, G.W., Cheung, T.H., Yoo, B., Santos, P.J., Lee, G.K., Shrager, J.B., and Rando, T.A. (2015).  
828 Ex Vivo Expansion and In Vivo Self-Renewal of Human Muscle Stem Cells. *Stem Cell Reports* 5, 621–  
829 632.

830

831 Chen, S.E., Jin, B., and Li, Y.P. (2007). TNF- $\alpha$  regulates myogenesis and muscle regeneration by  
832 activating p38 MAPK. *Am. J. Physiol. Cell Physiol.* 292, C1660–C1671.

833

834 Collinsworth, A.M., Zhang, S., Kraus, W.E., and Truskey, G.A. (2002). Apparent elastic modulus and

- 835 hysteresis of skeletal muscle cells throughout differentiation. *Am. J. Physiol. Cell Physiol.* 283, C1219-  
836 27.
- 837
- 838 Cosgrove, B.D., Sacco, A., Gilbert, P.M., and Blau, H.M. (2009). A home away from home: challenges  
839 and opportunities in engineering in vitro muscle satellite cell niches. *Differentiation* 78, 185–194.
- 840
- 841 Cosgrove, B.D., Gilbert, P.M., Porpiglia, E., Mourkioti, F., Lee, S.P., Corbel, S.Y., Llewellyn, M.E., Delp,  
842 S.L., and Blau, H.M. (2014). Rejuvenation of the muscle stem cell population restores strength to  
843 injured aged muscles. *Nat. Med.* 20, 255–264.
- 844
- 845 Davoudi, S., Chin, C.Y., Cooke, M.J., Tam, R.Y., Shoichet, M.S., and Gilbert, P.M. (2018). Muscle stem  
846 cell intramuscular delivery within hyaluronan methylcellulose improves engraftment efficiency and  
847 dispersion. *Biomaterials* 173, 34–46.
- 848
- 849 Egerman, M.A., and Glass, D.J. (2014). Signaling pathways controlling skeletal muscle mass. *Crit. Rev.*  
850 *Biochem. Mol. Biol.* 49, 59–68.
- 851
- 852 Engler, A.J., Griffin, M.A., Sen, S., Bonnemann, C.G., Sweeney, H.L., and Discher, D.E. (2004).  
853 Myotubes differentiate optimally on substrates with tissue-like stiffness: pathological implications for soft  
854 or stiff microenvironments. *J. Cell Biol.* 166, 877–887.
- 855
- 856 Engler, A.J., Sen, S., Sweeney, H.L., and Discher, D.E. (2006). Matrix elasticity directs stem cell  
857 lineage specification. *Cell* 126, 677–689.
- 858
- 859 Fu, X., Xiao, J., Wei, Y., Li, S., Liu, Y., Yin, J., Sun, K., Sun, H., Wang, H., Zhang, Z., et al. (2015).  
860 Combination of inflammation-related cytokines promotes long-term muscle stem cell expansion. *Cell*  
861 *Res.* 25, 1082–1083.
- 862
- 863 Gao, Y., Kostrominova, T.Y., Faulkner, J.A., and Wineman, A.S. (2008). Age-related changes in the  
864 mechanical properties of the epimysium in skeletal muscles of rats. *J. Biomech.* 41, 465–469.
- 865
- 866 Gilbert, P.M., Havenstrite, K.L., Magnusson, K.E.G., Sacco, A., Leonardi, N.A., Kraft, P., Nguyen, N.K.,  
867 Thrun, S., Lutolf, M.P., and Blau, H.M. (2010). Substrate Elasticity Regulates Skeletal Muscle Stem Cell  
868 Self-Renewal in Culture. *Science* (80- ). 329, 1078–1081.
- 869
- 870 Le Grand, F., Jones, A.E., Seale, V., Scime, A., Rudnicki, M.A., Scimè, A., and Rudnicki, M.A. (2009).  
871 Wnt7a activates the planar cell polarity pathway to drive the symmetric expansion of satellite stem cells.  
872 *Cell Stem Cell* 4, 535–547.
- 873
- 874 Gussoni, E., Pavlath, G.K., Lanctot, A.M., Sharma, K.R., Miller, R.G., Steinman, L., and Blau, H.M.  
875 (1992). Normal dystrophin transcripts detected in Duchenne muscular dystrophy patients after myoblast  
876 transplantation. *Nature* 356, 435–438.
- 877
- 878 Gussoni, E., Blau, H.M., and Kunkel, L.M. (1997). The fate of individual myoblasts after transplantation  
879 into muscles of DMD patients. *Nat. Med.* 3, 970–977.
- 880
- 881 Han, W.M., Anderson, S.E., Mohiuddin, M., Barros, D., Nakhai, S.A., Shin, E., Amaral, I.F., Pêgo, A.P.,  
882 García, A.J., and Jang, Y.C. (2018). Synthetic matrix enhances transplanted satellite cell engraftment in  
883 dystrophic and aged skeletal muscle with comorbid trauma. *Sci. Adv.* 4.
- 884
- 885 Heredia, J.E., Mukundan, L., Chen, F.M., Mueller, A.A., Deo, R.C., Locksley, R.M., Rando, T.A., and

- 886 Chawla, A. (2013). Type 2 innate signals stimulate fibro/adipogenic progenitors to facilitate muscle  
887 regeneration. *Cell* 153, 376–388.  
888
- 889 Jones, N.C., Tyner, K.J., Nibarger, L., Stanley, H.M., Cornelison, D.D.W., Fedorov, Y. V., and Olwin,  
890 B.B. (2005). The p38 $\alpha$ / $\beta$  MAPK functions as a molecular switch to activate the quiescent satellite cell. *J.*  
891 *Cell Biol.* 169, 105–116.  
892
- 893 Judson, R.N., and Rossi, F.M.V. (2020). Towards stem cell therapies for skeletal muscle repair (Nature  
894 Research).  
895
- 896 Judson, R.N., Quarta, M., Oudhoff, M.J., Soliman, H., Yi, L., Chang, C.K., Loi, G., Vander Werff, R.,  
897 Cait, A., Hamer, M., et al. (2018). Inhibition of Methyltransferase Setd7 Allows the In Vitro Expansion of  
898 Myogenic Stem Cells with Improved Therapeutic Potential. *Cell Stem Cell* 22, 177-190.e7.  
899
- 900 Lean, G., Halloran, M.W., Marescal, O., Jamet, S., Lumb, J.P., and Crist, C. (2019). Ex vivo Expansion  
901 of Skeletal Muscle Stem Cells with a Novel Small Compound Inhibitor of eIF2 $\alpha$  Dephosphorylation.  
902 *Regen. Med. Front.* 1, e190003.  
903
- 904 Li, W., Moylan, J.S., Chambers, M.A., Smith, J., and Reid, M.B. (2009). Interleukin-1 stimulates  
905 catabolism in C2C12 myotubes. *Am. J. Physiol. Cell Physiol.* 297, C706–C714.  
906
- 907 Lluís, F., Perdiguero, E., Nebreda, A.R., and Muñoz-Canoves, P. (2006). Regulation of skeletal muscle  
908 gene expression by p38 MAP kinases. *Trends Cell Biol.* 16, 36–44.  
909
- 910 Loiben, A.M., Soueid-Baumgarten, S., Kopyto, R.F., Bhattacharya, D., Kim, J.C., and Cosgrove, B.D.  
911 (2017). Data-Modeling Identifies Conflicting Signaling Axes Governing Myoblast Proliferation and  
912 Differentiation Responses to Diverse Ligand Stimuli. *Cell. Mol. Bioeng.* 10, 433–450.  
913
- 914 Lutolf, M.P., and Hubbell, J.A. (2003). Synthesis and physicochemical characterization of end-linked  
915 poly(ethylene glycol)-co-peptide hydrogels formed by Michael-type addition. *Biomacromolecules* 4,  
916 713–722.  
917
- 918 Lutolf, M.P., Gilbert, P.M., and Blau, H.M. (2009). Designing materials to direct stem-cell fate. *Nature*  
919 462, 433–441.  
920
- 921 McCormick, S.M., and Heller, N.M. (2015). Commentary: IL-4 and IL-13 receptors and signaling.  
922 *Cytokine* 75, 38–50.  
923
- 924 De Micheli, A.J., Laurillard, E.J., Heinke, C.L., Ravichandran, H., Fraczek, P., Soueid-Baumgarten, S.,  
925 De Vlaminck, I., Elemento, O., and Cosgrove, B.D. (2020). Single-Cell Analysis of the Muscle Stem Cell  
926 Hierarchy Identifies Heterotypic Communication Signals Involved in Skeletal Muscle Regeneration. *Cell*  
927 *Rep.* 30, 3583-3595.e5.  
928
- 929 Montarras, D., Morgan, J., Colins, C., Relaix, F., Zaffran, S., Cumano, A., Partridge, T., Buckingham,  
930 M., Collins, C., Relaix, F., et al. (2005). Direct isolation of satellite cells for skeletal muscle regeneration.  
931 *Science* (80-. ). 309, 2064–2067.  
932
- 933 Morrissey, J.B., Cheng, R.Y., Davoudi, S., and Gilbert, P.M. (2016). Biomechanical Origins of Muscle  
934 Stem Cell Signal Transduction. *J. Mol. Biol.* 428, 1441–1454.  
935
- 936 Palacios, D., Mozzetta, C., Consalvi, S., Caretti, G., Saccone, V., Proserpio, V., Marquez, V.E.,



- 937 Valente, S., Mai, A., Forcales, S. V, et al. (2010). TNF/p38alpha/polycomb signaling to Pax7 locus in  
938 satellite cells links inflammation to the epigenetic control of muscle regeneration. *Cell Stem Cell* 7, 455–  
939 469.
- 940
- 941 Pawlikowski, B., Vogler, T.O., Gadek, K., and Olwin, B.B. (2017). Regulation of skeletal muscle stem  
942 cells by fibroblast growth factors. *Dev. Dyn.* 246, 359–367.
- 943
- 944 Perdiguero, E., Ruiz-Bonilla, V., Gresh, L., Hui, L., Ballestar, E., Sousa-Victor, P., Baeza-Raja, B.,  
945 Jordi, M., Bosch-Comas, A., Esteller, M., et al. (2007). Genetic analysis of p38 MAP kinases in  
946 myogenesis: fundamental role of p38alpha in abrogating myoblast proliferation. *EMBO J.* 26, 1245–  
947 1256.
- 948
- 949 Price, F.D., Kuroda, K., and Rudnicki, M.A. (2007). Stem cell based therapies to treat muscular  
950 dystrophy. *Biochim. Biophys. Acta* 1772, 272–283.
- 951
- 952 Price, F.D., von Maltzahn, J., Bentzinger, C.F., Dumont, N.A., Yin, H., Chang, N.C., Wilson, D.H.,  
953 Frenette, J., and Rudnicki, M.A. (2014). Inhibition of JAK-STAT signaling stimulates adult satellite cell  
954 function. *Nat. Med.* 20, 1174–1181.
- 955
- 956 Qing, Y., and Stark, G.R. (2004). Alternative activation of STAT1 and STAT3 in response to interferon-  
957  $\gamma$ . *J. Biol. Chem.* 279, 41679–41685.
- 958
- 959 Quarta, M., Brett, J.O., DiMarco, R., De Morree, A., Boutet, S.C., Chacon, R., Gibbons, M.C., Garcia,  
960 V.A., Su, J., Shrager, J.B., et al. (2016). An artificial niche preserves the quiescence of muscle stem  
961 cells and enhances their therapeutic efficacy. *Nat. Biotechnol.* 34, 752–759.
- 962
- 963 Rando, T.A., and Blau, H.M. (1994). Primary mouse myoblast purification, characterization, and  
964 transplantation for cell-mediated gene therapy. *J. Cell Biol.* 125, 1275–1287.
- 965
- 966 Rao, N., Agmon, G., Tierney, M.T., Ungerleider, J.L., Braden, R.L., Sacco, A., and Christman, K.L.  
967 (2017). Engineering an Injectable Muscle-Specific Microenvironment for Improved Cell Delivery Using a  
968 Nanofibrous Extracellular Matrix Hydrogel. *ACS Nano* 11, 3851–3859.
- 969
- 970 Rinaldi, F., and Perlingeiro, R.C. (2014). Stem cells for skeletal muscle regeneration: therapeutic  
971 potential and roadblocks. *Transl. Res.* 163, 409–417.
- 972
- 973 Rosant, C., Nagel, M.D., and Perot, C. (2007). Aging affects passive stiffness and spindle function of  
974 the rat soleus muscle. *Exp. Gerontol.* 42, 301–308.
- 975
- 976 Sacco, A., Doyonnas, R., Kraft, P., Vitorovic, S., and Blau, H.M. (2008). Self-renewal and expansion of  
977 single transplanted muscle stem cells. *Nature* 456, 502–506.
- 978
- 979 Sampath, S.C., Sampath, S.C., Ho, A.T. V., Corbel, S.Y., Millstone, J.D., Lamb, J., Walker, J., Kinzel,  
980 B., Schmedt, C., and Blau, H.M. (2018). Induction of muscle stem cell quiescence by the secreted  
981 niche factor Oncostatin M. *Nat. Commun.* 9, 1531.
- 982
- 983 Sanes, J.R. (2003). The basement membrane/basal lamina of skeletal muscle. *J. Biol. Chem.* 278,  
984 12601–12604.
- 985
- 986 Schroder, K., Hertzog, P.J., Ravasi, T., and Hume, D.A. (2004). Interferon- $\gamma$ : an overview of signals,  
987 mechanisms and functions. *J. Leukoc. Biol.* 75, 163–189.

- 988 Segalés, J., Islam, A.B.M.M.K., Kumar, R., Liu, Q.-C., Sousa-Victor, P., Dilworth, F.J., Ballestar, E.,  
989 Perdiguero, E., and Muñoz-Cánoves, P. (2016). Chromatin-wide and transcriptome profiling integration  
990 uncovers p38 $\alpha$  MAPK as a global regulator of skeletal muscle differentiation. *Skelet. Muscle* 6, 9.  
991
- 992 Skuk, D. (2004). Myoblast transplantation for inherited myopathies: A clinical approach. *Expert Opin. Biol.*  
993 *Ther.* 4, 1871–1885.  
994
- 995 Sleep, E., Cosgrove, B.D., McClendon, M.T., Preslar, A.T., Chen, C.H., Sangji, M.H., Pérez, C.M.R.,  
996 Haynes, R.D., Meade, T.J., Blau, H.M., et al. (2017). Injectable biomimetic liquid crystalline scaffolds  
997 enhance muscle stem cell transplantation. *Proc. Natl. Acad. Sci. U. S. A.* 114, E7919–E7928.  
998
- 999 Stedman, H.H., Sweeney, H.L., Shrager, J.B., Maguire, H.C., Panettieri, R.A., Petrof, B., Narusawa, M.,  
1000 Lefterovich, J.M., Sladky, J.T., and Kelly, A.M. (1991). The mdx mouse diaphragm reproduces the  
1001 degenerative changes of Duchenne muscular dystrophy. *Nature* 352, 536–539.  
1002
- 1003 Tidball, J.G. (2017). Regulation of muscle growth and regeneration by the immune system. *Nat. Rev.*  
1004 *Immunol.* 17, 165–178.  
1005
- 1006 Tierney, M.T., Aydogdu, T., Sala, D., Malecova, B., Gatto, S., Puri, P.L., Latella, L., and Sacco, A.  
1007 (2014). STAT3 signaling controls satellite cell expansion and skeletal muscle repair. *Nat. Med.* 20,  
1008 1182–1186.  
1009
- 1010 Wang, Y.X., and Rudnicki, M.A. (2012). Satellite cells, the engines of muscle repair. *Nat. Rev. Mol. Cell*  
1011 *Biol.* 13, 127–133.  
1012
- 1013 Wolf, M.T., Dearth, C.L., Sonnenberg, S.B., Lobo, E.G., and Badyrak, S.F. (2015). Naturally derived  
1014 and synthetic scaffolds for skeletal muscle reconstruction. *Adv. Drug Deliv. Rev.* 84, 208–221.  
1015
- 1016 Wosczyzna, M.N., and Rando, T.A. (2018). A Muscle Stem Cell Support Group: Coordinated Cellular  
1017 Responses in Muscle Regeneration. *Dev Cell* 46, 135–143.  
1018
- 1019 Xu, C., Tabebordbar, M., Iovino, S., Ciarlo, C., Liu, J., Castiglioni, A., Price, E., Liu, M., Barton, E.R.,  
1020 Kahn, C.R., et al. (2013). A Zebrafish Embryo Culture System Defines Factors that Promote Vertebrate  
1021 Myogenesis across Species. *Cell* 155, 909–921.  
1022
- 1023 Yablonka-Reuveni, Z., Seger, R., and Rivera, A.J. (1999). Fibroblast growth factor promotes  
1024 recruitment of skeletal muscle satellite cells in young and old rats. *J. Histochem. Cytochem.* 47, 23–42.  
1025
- 1026 Yang, W., and Hu, P. (2018). Skeletal muscle regeneration is modulated by inflammation. *J. Orthop.*  
1027 *Transl.* 13, 25–32.  
1028
- 1029 Yin, H., Price, F., and Rudnicki, M.A. (2013). Satellite Cells and the Muscle Stem Cell Niche. *Physiol.*  
1030 *Rev.* 93, 23–67.  
1031
- 1032 Zismanov, V., Chichkov, V., Colangelo, V., Jamet, S., Wang, S., Syme, A., Koromilas, A.E., and Crist,  
1033 C. (2016). Phosphorylation of eIF2 $\alpha$  is a Translational Control Mechanism Regulating Muscle Stem Cell  
1034 Quiescence and Self-Renewal. *Cell Stem Cell* 18, 79–90.  
1035
